## **Autophagy-cell death balance is maintained by Polycomb-mediated regulation during stem cell differentiation**

Deepika Puri<sup>1\*</sup>, Aparna Kelkar<sup>1</sup>, Gauri Shankar Bhaskar<sup>1</sup> and Deepa Subramanyam<sup>1\*</sup>

<sup>1</sup>National Centre for Cell Science, Ganeshkhind road, SP Pune University 411007, Pune, India

\* Corresponding Author

Keywords: Autophagy, Cell death, Chromatin, Polycomb, Differentiation, Embryonic stem cells,

Dram1

**Abstract:**

Autophagy is a conserved cytoprotective process, aberrations in which, lead to numerous degenerative disorders. While the cytoplasmic components of autophagy have been extensively studied, the epigenetic regulation of autophagy genes, especially in stem cells, is less understood. Deciphering the epigenetic regulation of autophagy genes becomes increasingly relevant given the therapeutic benefits of small-molecule epigenetic inhibitors in novel treatment modalities. We observe that, during retinoic acid-mediated differentiation of mouse embryonic stem cells (mESCs), autophagy is induced, and identify the Polycomb enzyme EZH2 as a regulator of this process. In mESCs, EZH2 represses several autophagy genes including the autophagy regulator *Dram1*. EZH2 facilitates the formation of a bivalent chromatin domain at the *Dram1* promoter, which allows the expression of the gene and induction of autophagy during differentiation, while still retaining the repressive H3K27me3 mark. EZH2 inhibition leads to loss of the bivalent domain, and a consequential “hyper-expression” of *Dram1*, with extensive cell death. This study shows that Polycomb group proteins help maintain an autophagy-cell death balance during stem cell differentiation, in part, by regulating the expression of the *Dram1* gene.

## **Introduction**

Autophagy (macroautophagy) is an evolutionarily conserved catabolic process in which, cytosolic components are sequestered by double-membraned vesicles called autophagosomes, and transported to the lysosome for degradation [1,2]. The mechanism of autophagy includes steps such as autophagy initiation, nucleation, autophagosome formation, fusion with the lysosome, and ultimately lysosomal degradation [1]. This involves the function of a distinct set of evolutionarily conserved genes called Autophagy-related genes (ATG) that form complexes with other proteins [3]. While being constitutively active at low levels, external stimuli such as starvation, stress, etc, lead to an induction of autophagy. Autophagy modulation facilitates cellular homeostasis, metabolic turnover, and degradation of organelles and misfolded proteins [4]. Defects in autophagy are associated with numerous degenerative disorders such as Alzheimer's Disease, Parkinson's Disease, Amyotrophic Lateral Sclerosis among others [5]. While autophagy was previously thought of as a process, purely regulated by changes in cytosolic components, recent studies highlight the role of transcriptional regulation of autophagy genes in governing this pathway [6,7].

Epigenetic regulation, primarily mediated by modifications to chromatin, is one of the major governing factors of gene transcription [8]. Autophagy genes are regulated at the chromatin level by epigenetic modifiers such as BRD4 [9], G9A [10], CARM1 [11], and hMOF [12]. Additionally, transcription factors such as TFEB, FOXO, FOXA, C/EBP $\beta$ , ATF4, ZKSCAN3, E2F1, and others regulate the transcription of autophagy genes (reviewed in [13]). More recently, non-coding RNAs such as miRNA, lncRNA, circRNA have also been implicated in autophagy gene regulation [14]. These studies point to the essential role of autophagy gene transcription in modulating the pathway. However, the focus of these reports is limited to individual regulatory mechanisms in isolated cell types, and a detailed study identifying regulators of autophagy genes is lacking. This lacuna is starker in the case of embryonic stem cells (ESCs) which have the unique property of self-renewal and the ability to differentiate into three germ layers. Hence, these cells require an efficient homeostatic system, and precisely regulated cellular and

metabolic turnover pathways such as autophagy [15]. While reports emphasize the importance of balanced autophagy levels in governing the ESC state [16–18], how these levels are maintained in the context of transcriptional regulation of autophagy genes in steady-state and cell state transition is less understood. This is especially important as autophagy has been implicated as an essential determinant for tissue differentiation as well as the self-renewal and differentiation potential of embryonic and adult stem cells [19,20]. It also has roles in vasculogenesis, angiogenesis, skeletal muscle maintenance, regeneration, and immune system homeostasis [21]. Furthermore, embryonic and adult development and cell differentiation are associated with cell death, with significant cross-talk existing between autophagy and cell death as well as the genes involved in both pathways [22]. In fact, autophagic cell death is crucial for normal development in some organisms [23].

Determining whether changes in autophagy during stem cell differentiation correlate with changes in autophagy gene expression, and dissecting the mechanisms regulating these genes, would help open up potential avenues to identify druggable targets for autophagy modulation. This becomes pertinent given the background of mis-regulated autophagy genes being implicated in degenerative disorders, tumorigenesis and cancer progression, genome instability, impaired immune signalling and pathogen degradation among other disorders [24–26]. This study focuses on understanding the regulation of autophagy in mESCs in steady-state and during the early stages of differentiation. We observe an induction of autophagy as mESCs differentiate, which is accompanied by the upregulation of a subset of autophagy genes. Using a small molecule epigenetic inhibitor screen, we identify chromatin modifiers such as BRD4, G9A, EED and EZH2 as repressors of autophagy in mESCs. We further determine a novel role for EZH2 in autophagy maintenance during mESC differentiation, by regulating the expression of the autophagy gene, *Dram1*. Inhibition of EZH2 leads to the derepression of *Dram1*, which correlates with a shift from autophagy induction to caspase-independent cell death in differentiating mESCs. Thus, epigenetic regulation of *Dram1* by EZH2 helps to maintain the autophagy-cell death balance during mESC differentiation. The data shown in this study point to the crucial role of chromatin-mediated regulation of autophagy genes in governing this pathway as cells differentiate,

and open new avenues for using epigenetic inhibitors, as druggable solutions for autophagy-mediated disorders.

## **Materials and methods**

### **Cell culture and differentiation**

V6.5 mESCs were cultured in the absence of feeders on 0.2% gelatin-coated plastic tissue culture dishes (Corning). Cells were grown in Knockout DMEM (Gibco, 10829-018) containing 15% FBS (Gibco, 10270-106), 2mM L glutamate 100X (Gibco, 25030-081), 1X penicillin/streptomycin (Gibco, 15140-122), 1mM 100X MEM non-essential amino acids (Gibco, 11140-050), 2-mercaptoethanol 1000X (Gibco, 21985-023) and 1000U LIF (Leukaemia Inhibitory Factor) prepared in-house. For neural differentiation in monolayer culture, cells were grown in -LIF media containing 500nM retinoic acid. Media was changed every day, and cells were harvested at different time points. For autophagy induction, cells were treated with 2.5mM Rapamycin (ThermoFisher, PHZ1235) for 12 hours or 7.5 $\mu$ M Chloroquine (Sigma, C6628) for 8 hours. For autophagy inhibition, cells were treated with 4 $\mu$ M Wortmannin (Sigma, W1628) for 6 hours. For caspase inhibition, cells were treated with 20 $\mu$ M Z VAD-FMK (Sigma, 219007) for 3 hours.

### **Establishment of mCherry-GFP-LC3 mESCs**

The FUW mCherry-GFP-LC3 plasmid [27] was a gift from Anne Brunet (Addgene, 110060) and was co-transfected with psPAX2 (Addgene, 12260) and pMD2.G (Addgene, 12259) in 60% confluent HEK293T cells using FuGENE HD (Promega, E2311). 48 hours post transfection, viral supernatants were harvested and used for infection in the presence of 5 $\mu$ g/ml polybrene in V6.5 mESCs. The infected mESCs were subjected to FACS sorting and cells expressing high levels of GFP and mCherry were maintained as a polyclonal population and used in experiments. The cells were periodically checked for mycoplasma contamination.

### **Epigenetic inhibitor treatment**

Small molecule inhibitors for epigenetic pathways (Table S1) were a kind gift from the Structural Genomics Consortium. The drugs and their inactive analogs (used as negative controls) were dissolved in DMSO and working concentrations and treatment durations were optimized using standard protocols. The final treatment conditions are described in (Table S1).

### **Autophagy detection**

Cyto-ID (Enzo, ENZ-51031-K200) autophagy detection kit was used to assess autophagy levels in cells using published protocols [28].

### **Confocal microscopy**

The mCherry-GFP-LC3 mESCs were used to detect autophagy using confocal microscopy with a Nikon Eclipse Ti2 microscope using the 64X objective. The GFP and mCherry puncta were quantified using FIJI (ImageJ). After removal of background and setting appropriate intensity thresholds, the number of GFP and mCherry puncta were counted, and puncta per cell were calculated using DAPI as nuclear marker.

### **Immunoblot**

Total proteins were extracted from cells using RIPA buffer containing proteinase inhibitors on ice, followed by centrifugation at 12,000 rpm for 20 min at 4 °C. Protein concentration was measured using Bradford's reagent. Total protein was subjected to SDS-PAGE under reducing conditions followed by transfer on to a PVDF membrane. The membrane was blocked using 5% BSA in Tris-buffered saline (TBS). Post blocking, the membrane was incubated at 4 °C overnight with the appropriate primary antibody. After 3 × 10 min wash in 1X TBS containing 0.1% Tween-20 (TBS-T), the membranes were incubated with an HRP-conjugated secondary antibody for 1 hour at room temperature. The membranes were developed using Femto substrate development kit (Invitrogen, 34094) and images were captured using a chemi-doc system (GE Healthcare, AI600). The following primary and secondary antibodies were used in the study:  $\alpha$ Tubulin (Sigma, T5168): 1:5000; LC3

(ProteinTech, 12135-1-AP): 1:1000; H3K27me3 (CST, 9733T): 1:1000; Caspase 3 (CST, 9662S): 1:1000; Anti rabbit HRP (Invitrogen, G-21234): 1:2000; Anti mouse HRP (Invitrogen, G21040): 1:2000.

### **qRT PCR**

Trizol (Life Technologies,15596018) was used to isolate total RNA from cells. After DNase treatment, RNA was quantified using a NanoDrop spectrophotometer. Verso cDNA synthesis kit (Thermo Scientific, AB-1453) was used to generate cDNA. Diluted cDNA was used for qRT-PCR using gene specific primers (Table S2) and Power SYBR Green PCR Master Mix (Applied Biosystems, A25742). *Gapdh* was used as an endogenous control.

### ***Dram1* siRNA generation**

Template for esiRNA [29,30] production against specific genes was prepared by PCR amplification from mESC or MEF cDNA. *In vitro* transcription was performed using T7 RNA polymerase, followed by digestion of the double-stranded RNA using RNase III. RNA was then transfected into mESCs using the DharmaFECT 1 transfection reagent (Dharmacon, T-2001-02). After 72 hours, cells were lysed in TRIzol for RNA, or in RIPA lysis buffer to prepare whole-cell protein extract. Non-targeting esiRNA was prepared using GFP as a template in all experiments.

### **Chromatin immunoprecipitation (ChIP)**

mESCs were grown in 10 cm plates at 70% confluency. After trypsinization, cells were fixed for 10 min at 37 °C using a final concentration of 1% formaldehyde. Glycine was added to a final concentration of 125mM to quench the crosslinking reaction. Cells were washed twice with ice cold 1x PBS. 1 ml SDS lysis buffer was added to each sample and incubated at 4 degrees for 30 minutes. This was followed by sonication using a Bioruptor™ (UCD200) at high setting for 30 seconds ON, 60 seconds OFF for 25 cycles. Subsequent steps were performed as described in [31]. The purified DNA was analysed by qPCR using specific primers as described in Table S2. The antibodies used for ChIP are as follows: H3K27me3 (Invitrogen, MA5-11198): 4µg. H3K4me3 (Diagenode, C15410003-50): 2µg.

## **Results**

### **Autophagy is induced during RA-mediated mESC differentiation.**

To determine autophagy status in mESCs, we established a stable mESC line expressing the autophagosome membrane protein LC3, tagged with GFP and mCherry (henceforth called LC3-tagged-mESCs) [27]. Autophagosomes were identified by the presence of GFP as well as mCherry positive puncta, while autophagic flux was detected by the loss of GFP positive puncta as autophagosomes fuse with the lysosomes. Untreated mESCs showed fewer and diffused GFP and mCherry positive puncta (Figure S1a), while induction of autophagy by the known autophagy activator rapamycin, led to an increase in both GFP and mCherry positive puncta indicating an increase in both autophagy initiation and flux. Treatment by the autophagosome-lysosome fusion inhibitor chloroquine however, led to an increase in GFP positive puncta and a reduction of mCherry positive puncta, consistent with the accumulation of autophagosomes and block in autophagic flux (Figure S1a and S1b). These cells therefore, were reliable indicators of autophagy levels in mESCs at steady state as well as in response to autophagy modulators. We further treated these cells with retinoic acid (RA) to determine the status of autophagy during mESC differentiation along the neural lineage. The cells expressed neural markers such as *Nestin* and  *$\beta$ III tubulin* and lost pluripotency markers such as *Oct4* and *Nanog* after 3 days of RA treatment (Figure S1c). Undifferentiated mESCs exhibited largely diffused GFP and mCherry, with few GFP-positive puncta and a higher number of mCherry puncta, consistent with basal levels of autophagy in these cells. RA treatment however, resulted in the increased formation of distinct GFP and mCherry positive puncta indicating an increase in autophagy initiation and autophagic flux (Figure 1a and 1b). We verified this increase in autophagy at the protein level by immuno-blotting with an antibody against LC3. We observed an increase in LC3 II levels and LC3 II/LC3 I ratio upon RA treatment of mESCs indicating an induction of autophagy (Figure 1c and 1d).

To determine whether the induction of autophagy during mESC differentiation was accompanied by an increase in the expression of autophagy genes, we analysed published RNA-Seq data (GSE84401



[32]) to determine the expression levels of autophagy genes in mESCs, embryoid bodies (EBs), RA treated EBs and RA treated mESCs grown in N2B27 media. We found that out of 86 genes, 24 genes were significantly upregulated (>2 fold) upon mESC differentiation (Figure 1e and S1d). Interestingly, the most highly upregulated genes were regulators of autophagy rather than genes coding for constituents of the pathway itself. These include autophagy activators such as *Dram1*, *Ulk2*, *Gfi1b* and *Wipi1*. Genes coding for antiapoptotic proteins such as BCL2 and GSPM1 were also upregulated in differentiated cells. We validated the upregulation of select genes in mESCs treated with RA by RT-qPCR. We saw a significant upregulation in the expression of genes such as *Lamp2*, *Gabarap*, *Ulk2*, *Dram1*, *Wipi1* among others (Figure 1f). Among the Atg genes, *Atg4b*, *Atg4c*, *Atg7*, and *Atg10* were upregulated in RA treated mESCs. Our studies indicate that autophagy is induced in RA-mediated differentiation of mESCs and this is associated with an increased expression of a subset of autophagy genes.

#### **Autophagy genes are regulated by epigenetic pathways.**

As mESC differentiation led to an upregulation of autophagy genes, we sought to identify transcriptional regulators of these genes. Epigenetic regulatory mechanisms play a crucial role in determining transcriptional outcomes in response to stimuli. To identify the epigenetic regulators of autophagy, we used small molecule inhibitors (Table S1) targeting specific epigenetic pathways. We used a fluorescence-based autophagy detection kit (Cyto-ID) to detect autophagy levels. We observed an increase in autophagy in mESCs treated with inhibitors such as GSK343 (EZH2), UNC1999 (EZH2), A-395 (EED), UNC0642(G9a/GLP), A366 (G9a/GLP), and JQ1 (BET domain proteins) (Figure 2a); while treatment with other inhibitors did not show a significant change in autophagy (Figure S2a). Treatment with chemically inactive analogues such as UNC2400 (EZH2-ve), A395N (EED -ve), -JQ1 (BET domain -ve) did not show significant changes in autophagy (Figure 2a), indicating specific effects of certain epigenetic inhibitors on autophagy. We validated the FACS data by treating LC3-tagged-ES cells with GSK343, A366, and JQ1; and observed an induction of autophagy as seen by an increase in GFP and

mCherry positive puncta (Figure 2b and 2c). Our screen identified the Polycomb group proteins EED and EZH2 as regulators of autophagy in mESCs. Inhibition of EZH2 using GSK343 as well as UNC1999 led to a significant induction of autophagy (Figure 2a, 2b and 2c). FACS analysis in LC3-tagged-ES cells revealed an increase in both GFP and mCherry positive puncta upon treatment with GSK343. However, the increase of mCherry puncta was higher than that of the GFP puncta indicating an increase in autophagic flux upon EZH2 inhibition (Figure 2c). RT-qPCR analysis showed the mis-regulation of several autophagy genes upon treatment with small molecule epigenetic inhibitors (Figure 2d). Genes such as *Becn1*, *Lc3a* and *Ulk2* were upregulated upon treatment with all candidate inhibitors, while other genes responded in an inhibitor-dependent manner, indicating that different epigenetic molecules regulate the expression of distinct autophagy genes. Interestingly, genes such as *Lamp2*, *Dram1*, and *Ulk2* which were upregulated upon RA treatment (Figure 1e and 1f) were also upregulated upon inhibition of EZH2 as well as EED in mESCs (Figure 2d), indicating a putative role for the Polycomb group proteins in the regulation of these genes during mESC differentiation. Taken together, these results indicate that in mESCs, autophagy is repressed by epigenetic modulators such as G9a/GLP, EZH2, EED and BET proteins and inhibition of these pathways results in a concomitant upregulation of autophagy genes.

### **EZH2 inhibition leads to caspase-independent, autophagy-associated cell death in differentiating mESCs.**

Polycomb group proteins regulate numerous cellular pathways that play crucial roles in cellular homeostasis, development and differentiation, and the enzyme EZH2 is the primary determinant for the establishment of the repressive H3K27me3 modification of target sites. Given the specific roles of Polycomb proteins in stem cells and during neuronal differentiation [33–36], we focussed our further experiments on dissecting the role of the Polycomb enzyme EZH2 in autophagy regulation in mESCs and differentiation. Observation of cells under brightfield showed that while mESCs treated with GSK343 did not exhibit significant changes in morphology, RA-treated cells exposed to GSK343,

showed extensive cell death (Figure S2b). Cell counting assay showed that compared to untreated mESCs, 49% of cells remained on day 3 of RA treatment and this number dropped to 8% when cells were treated with RA\_GSK343 (Figure S2c). Treatment with GSK343 alone however, did not significantly affect the doubling of ES cells. While programmed cell death is a hallmark of neural differentiation in normal development, RA-mediated differentiation, as well as in neuroblastomas [37–40]; treatment with RA\_GSK343 exacerbated this phenomenon and we found no viable cells beyond day 4 of treatment. We limited our further treatment duration to 48 hours as extensive cell death was seen beyond this point. To determine whether the cell death phenomenon was apoptosis-dependent, we performed Annexin-PI staining followed by FACS analysis. We observed that, consistent with previous reports [37], there was an increase in the percentage of Annexin-positive (Early apoptotic) and Annexin+PI-positive (Late apoptotic) cells upon RA treatment of mESCs. In RA\_GSK343 treated cells however, there was a significant increase in PI-positive/Annexin-negative as well as Annexin+PI-positive cells, while the percentage of only Annexin-positive cells remained largely unchanged (Figure 3a and S2d). The increase in PI-positive/Annexin-negative cells in RA\_GSK343 treated cells indicates an induction of non-apoptotic cell death. To determine whether the cell death was Caspase-dependent, we performed immunoblotting with a Caspase-3 antibody and saw no change in cleaved Caspase-3 levels (Figure 3b) in RA\_GSK343 treated cells. We validated this by testing the effect of the pan-Caspase inhibitor, Z VAD-FMK, on RA\_GSK343 treated cells, with etoposide treated ES cells as a positive control for cell death. While the percentage of Annexin-positive and Annexin+PI-positive cells were reduced in Etoposide+Caspase inhibitor treated cells, we observed no significant changes in the presence of RA\_GSK343+Caspase inhibitor (Figure S2e), further confirming that the cell death phenotype is Caspase independent. RT-qPCR using primers for pro-apoptotic genes also revealed no significant changes at the transcript level (Figure S2f).

Autophagic cell death (Type II cell death) refers to non-apoptotic cell death that is accompanied by increase in autophagy [41]. Because the causative relationship between autophagy and cell death is difficult to assess [42], the guidelines for the nomenclature of autophagic processes suggest that type

II cell death can be classified as autophagy-mediated or autophagy-associated depending on whether the observed cell death is accompanied by an increase in autophagy and whether chemical or genetic inhibition of autophagy is able to rescue cell death [43,44]. To determine whether EZH2 inhibition in differentiating mESCs caused autophagic cell death, we assessed the levels of autophagy in RA\_GSK343 treated cells. We observed that treatment with RA, GSK343 and RA\_GSK343 led to a robust induction of autophagy, however, RA\_GSK343 treatment led to similar levels of induction as individual treatments (Figure 3c and S3a). This may indicate that the processes by which GSK343 and RA activate autophagy, may be overlapping. The overlap between autophagy genes upregulated in RA as well as GSK343 treated cells (Figures 1e,1f and 2d) also points to a potential common mechanism of autophagy activation by the two treatment conditions. To determine whether the cell death phenotype was autophagy-dependent, we treated the cells with autophagy inhibitor Wortmannin. Wortmannin treatment led to a reduction in autophagy in RA\_GSK343 treated cells (Figure 3d). However, Annexin-PI staining showed a modest, statistically insignificant reduction in cell death upon wortmannin treatment (Figure 3e). This indicates that while the cell death seen in RA\_GSK343 treated cells is accompanied by an increase in autophagy, it may not be completely autophagy-dependent.

### **EZH2 targets *Dram1* to regulate autophagy and cell death.**

As treatment with RA and GSK343 led to an increase in autophagy and RA\_GSK343 treatment led to an increase in autophagy along with cell death, we sought to dissect the possible mechanism that regulated this phenotype. GSK343 is a selective inhibitor of the Polycomb group enzyme EZH2, that establishes the H3K27me3 mark to repress target genes [45,46]. To determine whether the induction of autophagy and cell death in RA\_GSK343 treated cells was associated with changes in autophagy gene expression, we compared the genes upregulated in RA and GSK343 treatment (Figures 1e, 1f and 2d). We identified genes such as *Lamp2*, *Gabarap* and *Dram1*, upregulated in RA as well as GSK343 treated cells. The gene coding for the DNA damage-regulated autophagy modulator 1 (DRAM1) was of special interest, as this protein is shown to activate autophagy as well as cell death [47–49] and

could potentially serve as a regulator of both phenotypes observed in our experiments. *Dram1* was upregulated in mESCs treated with RA as well as GSK343; however, RA\_GSK343 treatment led to a further compounded upregulation of *Dram1*, many times higher than individual treatments (Figure 4a). We used an siRNA-mediated *Dram1* knockdown approach to determine the role of *Dram1* in the induction of autophagy and cell death. We saw a significant decrease in *Dram1* expression in siRNA treated cells (*Dram1* KD) (Figure S3b). We then characterised the effect of *Dram1* knockdown on autophagy and cell death levels in mESCs as well as differentiating cells. CytoID assay revealed that autophagy levels remained unchanged in control, RA and RA\_343 treated *Dram1* KD cells, however, significant reduction in autophagy was seen in GSK343 treated mESCs (Figure 4b). This indicates that the autophagy induction seen in RA treated cells may not depend on *Dram1*. This data also suggests that while autophagy induction is seen in RA\_GSK343 treated cells, knockdown of *Dram1* is insufficient to reverse this induction and may point to other regulatory modules. Other upstream autophagy regulators such as *Gabarap* and *Lamp2* which were also upregulated in RA treated cells may contribute to the induction of autophagy.

To determine the effect of *Dram1* depletion on cell death, we performed Annexin-PI staining. Interestingly, we observed that *Dram1* KD was able to partially rescue cell death only in RA\_GSK343 treated cells, where we detected significant reduction of Annexin-negative/PI-positive as well as Annexin+PI-positive cells (Figure 4c). This effect was not seen in other treatment conditions. Our results point to distinct effects of *Dram1* KD on autophagy and cell death in mESCs and differentiating cells which may indicate that *Dram1* plays a cell state specific role in regulating autophagy vs. cell death. This regulation may be mediated by the Polycomb complex, as *Dram1* upregulation by the EZH2 inhibitor primarily affected autophagy in mESCs, and cell death in differentiating cells.

*Dram1* has been identified as a p53 dependent regulator of autophagy and apoptosis [48]. To determine whether the effect of GSK343 on *Dram1* is mediated by p53, we determined the levels of p53 transcript in our cells. We observed no significant changes in p53 in any of our treatments (Figure

S3c). This indicates that *Dram1* transcription may directly be regulated by EZH2. To determine whether EZH2 is enriched at the *Dram1* promoter, we analysed published CHIP-Seq data (GSE89929) [50], and observed an enrichment of EZH2 as well as the H3K27me3 mark at the *Dram1* promoter in mESCs. In contrast, *Lamp2*, which was also upregulated in RA treated cells remained devoid of both EZH2 and H3K27me3 enrichment (Figure 4d). This indicates that the *Dram1* promoter is selectively targeted by EZH2. The upregulation of *Lamp2* upon GSK343 treatment may be attributed to an indirect mechanism involving upstream regulators of the gene. As our studies indicated that *Dram1* upregulation leads to distinct effects on autophagy and cell death in mESCs vs differentiating cells, we analysed the enrichment of activating and repressive chromatin modifications on the *Dram1* promoter in these cells. CHIP-Seq data (GSE135318) [51], revealed that the *Dram1* promoter is enriched with primarily the H3K27me3 mark in mESCs. In neural progenitor cells (NPCs) however, we observed the enrichment of H3K27me3 as well as H3K4me3 at the *Dram1* promoter (Figure S3d). The increase in the active mark H3K4me3 in NPCs is consistent with the increased expression of *Dram1*. This pattern of chromatin modifications, called the bivalent domain is commonly present on promoters of genes that are repressed but poised for activation in stem cells [52]. We validated this in mESCs and RA treated cells by CHIP-qPCR and observed that while the *Dram1* promoter was marked with H3K27me3 in mESCs, a bivalent domain (H3K27me3 and H3K4me3) is seen in RA treated cells. Upon GSK343 treatment, H3K27me3 is reduced, leaving high enrichment of H3K4me3 in RA\_GSK343 cells (Figure 4e and S3e), which correlates with the compounded increase in *Dram1* expression. Taken together, our results indicate that in mESCs, the *Dram1* gene is repressed by the action of Polycomb group proteins and the deposition of H3K27me3 on the promoter. As cells differentiate, activating marks such as H3K4me3 are deposited, which contribute to the upregulation of *Dram1* and induction of autophagy. However, the H3K27me3 mark is retained on the promoter resulting in the establishment of a bivalent domain, which possibly limits the expression of *Dram1*. Treatment of differentiating cells with the EZH2 inhibitor GSK343 abolishes the H3K27me3 mark, and this coupled with the activating H3K4me3 modification, results in a “hyper-expression” of *Dram1* and extensive cell death (Figure 4f). Thus,

Polycomb mediated regulation of the *Dram1* gene helps to regulate autophagy in mESCs and cell death during early RA-mediated differentiation.

## **Discussion**

This study presents a systematic analysis of autophagy regulation in mESCs and early neural differentiation. The increase in autophagy seen during RA-mediated differentiation of mESCs is consistent with previous studies that show autophagy induction during differentiation in the mouse olfactory bulb and also in RA treated mouse neuroblastoma cells [53,54]. Several autophagy genes were upregulated in differentiating cells. Interestingly, the gene coding for the lysosomal protein LAMP2 was the one of most upregulated autophagy gene upon mESC differentiation, which is consistent with previous reports [18]. GABARAP has been shown to induce autophagy via ULK1 activation [55]. DRAM1 regulates autophagic flux by enhancing lysosomal acidification in an mTOR-dependent pathway [47,56]. Our results are in line with previous reports which show that autophagy is induced during the differentiation of human ESCs, neural and cardiac stem cells [53,57,58]. However, autophagy is reported to be reduced during the differentiation of haematopoietic, dermal and epidermal stem cells [59]. The difference in trends between different stem cell types point to a context-specific role of autophagy in self-renewal and differentiation [59,60]. It would be interesting to determine autophagy levels in mESCs subject to directed differentiation along different lineages. Targeted knock-out and overexpression experiments using the autophagy genes up-regulated in RA treated cells would help elucidate the causative effect of autophagy induction in mESC differentiation. The small molecule epigenetic inhibitor screen identified G9A/GLP, EZH2 and BET domain proteins as autophagy repressors in mESCs. G9A/GLP has been reported as a repressor of autophagy in HeLa cells, MEFs, and various cancer cell lines [10,61,62,62]. In contrast, *Drosophila* G9A activates starvation induced autophagy by activating the autophagy gene *Atg8a* [63], indicating a context specific role of the enzyme. It would be interesting to compare targets of G9A/GLP in different cell/model systems to determine the downstream effectors of autophagy regulation. The role of JQ1 as an activator of

autophagy has been reported in studies on cancer cell lines as well as in viral infections and recovery after spinal cord injuries [64–67]. Our data is consistent with the role of JQ1 as an activator of autophagy in mESCs. Our study presents the Polycomb group proteins EZH2 and EED as novel regulators of autophagy in mESCs and indicates that EZH2 targets *Dram1* to regulate its expression. Our data also suggest that RA mediated differentiation of ES cells leads to an induction of autophagy as well as apoptosis. However, treatment with EZH2 inhibitor in differentiating cells leads to severe cell death which is independent of the caspase pathway. This function, while being associated with autophagy, may not be dependent on autophagy induction, as inhibition of autophagy was unable to rescue the severe cell death phenotype. It is tempting to hypothesize that the balance between autophagy and cell death is maintained in stem cells and early differentiation by regulating *Dram1* expression levels which in turn are governed by epigenetic pathways. The mechanism causing the shift between autophagy and cell death remains to be understood. DRAM1 is a lysosomal protein that regulates cell death by increasing the levels and lysosomal localisation of the pro-apoptotic protein BAX in a transcription independent manner [49]. While our results did not show a change in the transcript levels of pro-apoptotic genes in RA\_GSK343 treated cells (Figure S2e), *Dram1* upregulation may lead to increase in BAX localization to lysosome which inhibits its degradation and enhances cell death. Additionally, while the focus of our study has been on the regulation of *Dram1* by EZH2, one cannot discount the possibility that GSK343 treatment would cause global transcriptional changes, indirectly affecting our phenotype. Polycomb group proteins perform regulatory functions in a myriad of cellular pathways [46] and the cell death phenotype may be a result of alternative regulatory pathways. CHIP-Seq and RNA-Seq experiments using RA\_GSK343 treated cells would shed light on the genome-wide effects of the inhibitor treatment on EZH2 occupancy and gene expression; and enable an accurate dissection of the balance between autophagy and cell death.

Our study identifies small molecule epigenetic drugs that activate autophagy in mESCs. Epigenetic inhibitors have emerged as promising therapeutic alternatives to cytotoxic drug regimens [68]. Thus the identification of novel regulatory mechanisms for cytoprotective pathways such as autophagy not



only provides an enhanced understanding of the role of autophagy in stemness and differentiation, but also facilitates new avenues into developing druggable treatment paradigms to combat autophagy-mediated disorders.

### **Author contributions:**

D.P conceptualized, designed and performed the experiments of the project. A.K contributed to the experiments depicted in figures 1c,3b and 4a. G.S.B contributed to the experiments depicted in figures 1f,2d and 4d. D.P wrote the original draft. The work was carried out in D.S lab using grants awarded to D.P and D.S

### **References**

- 1 Bento CF, Renna M, Ghislat G, Puri C, Ashkenazi A, Vicinanza M, Menzies FM & Rubinsztein DC (2016) Mammalian Autophagy: How Does It Work? *Annu Rev Biochem* **85**, 685–713.
- 2 Mizushima N (2007) Autophagy: process and function. *Genes Dev* **21**, 2861–2873.
- 3 Levine B & Kroemer G (2019) Biological Functions of Autophagy Genes: A Disease Perspective. *Cell* **176**, 11–42.
- 4 Mizushima N & Komatsu M (2011) Autophagy: Renovation of Cells and Tissues. *Cell* **147**, 728–741.
- 5 Jiang P & Mizushima N (2014) Autophagy and human diseases. *Cell Res* **24**, 69–79.
- 6 Füllgrabe J, Klionsky DJ & Joseph B (2014) The return of the nucleus: transcriptional and epigenetic control of autophagy. *Nat Rev Mol Cell Biol* **15**, 65–74.
- 7 Puri D & Subramanyam D (2019) Stress-(self) eating: Epigenetic regulation of autophagy in response to psychological stress. *The FEBS Journal*.
- 8 Allis CD & Jenuwein T (2016) The molecular hallmarks of epigenetic control. *Nat Rev Genet* **17**, 487–500.
- 9 Campbell GR, Bruckman RS, Herns SD, Joshi S, Durden DL & Spector SA (2018) Induction of autophagy by PI3K/MTOR and PI3K/MTOR/BRD4 inhibitors suppresses HIV-1 replication. *Journal of Biological Chemistry* **293**, 5808–5820.
- 10 Artal-Martinez de Narvajás A, Gomez TS, Zhang J-S, Mann AO, Taoda Y, Gorman JA, Herreros-Villanueva M, Gress TM, Ellenrieder V, Bujanda L, Kim D-H, Kozikowski AP, Koenig A & Billadeau DD (2013) Epigenetic Regulation of Autophagy by the Methyltransferase G9a. *Mol Cell Biol* **33**, 3983–3993.
- 11 Shin H-JR, Kim H, Oh S, Lee J-G, Kee M, Ko H-J, Kweon M-N, Won K-J & Baek SH (2016) AMPK–SKP2–CARM1 signalling cascade in transcriptional regulation of autophagy. *Nature* **534**, 553–557.
- 12 Füllgrabe J, Lynch-Day MA, Heldring N, Li W, Struijk RB, Ma Q, Hermanson O, Rosenfeld MG, Klionsky DJ & Joseph B (2013) The histone H4 lysine 16 acetyltransferase hMOF regulates the outcome of autophagy. *Nature* **500**, 468–471.
- 13 Di Malta C, Cinque L & Settembre C (2019) Transcriptional Regulation of Autophagy: Mechanisms and Diseases. *Frontiers in Cell and Developmental Biology* **7**.
- 14 Ma Q, Long S, Gan Z, Tettamanti G, Li K & Tian L (2022) Transcriptional and Post-Transcriptional Regulation of Autophagy. *Cells* **11**, 441.

- 15 Martello G & Smith A (2014) The nature of embryonic stem cells. *Annu Rev Cell Dev Biol* **30**, 647–675.
- 16 Pohl C & Jentsch S (2009) Midbody ring disposal by autophagy is a post-abscission event of cytokinesis. *Nat Cell Biol* **11**, 65–70.
- 17 Kuo T-C, Chen C-T, Baron D, Onder TT, Loewer S, Almeida S, Weismann CM, Xu P, Houghton J-M, Gao F-B, Daley GQ & Doxsey S (2011) Midbody accumulation through evasion of autophagy contributes to cellular reprogramming and tumorigenicity. *Nat Cell Biol* **13**, 1214–1223.
- 18 Xu Y, Zhang Y, García-Cañaveras JC, Guo L, Kan M, Yu S, Blair IA, Rabinowitz JD & Yang X (2020) Chaperone-mediated autophagy regulates the pluripotency of embryonic stem cells. *Science* **369**, 397–403.
- 19 Boya P, Codogno P & Rodriguez-Muela N (2018) Autophagy in stem cells: repair, remodelling and metabolic reprogramming. *Development* **145**, dev146506.
- 20 Ho TT, Warr MR, Adelman ER, Lansinger OM, Flach J, Verovskaya EV, Figueroa ME & Passegué E (2017) Autophagy maintains the metabolism and function of young and old stem cells. *Nature* **543**, 205–210.
- 21 Perrotta C, Cattaneo MG, Molteni R & De Palma C (2020) Autophagy in the Regulation of Tissue Differentiation and Homeostasis. *Frontiers in Cell and Developmental Biology* **8**.
- 22 Mizushima N & Levine B (2010) Autophagy in mammalian development and differentiation. *Nat Cell Biol* **12**, 823–830.
- 23 Levine B & Klionsky DJ (2004) Development by Self-Digestion: Molecular Mechanisms and Biological Functions of Autophagy. *Developmental Cell* **6**, 463–477.
- 24 Rubinsztein DC (2006) The roles of intracellular protein-degradation pathways in neurodegeneration. *Nature* **443**, 780–786.
- 25 Levine B & Deretic V (2007) Unveiling the roles of autophagy in innate and adaptive immunity. *Nat Rev Immunol* **7**, 767–777.
- 26 Gozuacik D & Kimchi A (2004) Autophagy as a cell death and tumor suppressor mechanism. *Oncogene* **23**, 2891–2906.
- 27 Leeman DS, Hebestreit K, Ruetz T, Webb AE, McKay A, Pollina EA, Dulken BW, Zhao X, Yeo RW, Ho TT, Mahmoudi S, Devarajan K, Passegué E, Rando TA, Frydman J & Brunet A (2018) Lysosome activation clears aggregates and enhances quiescent neural stem cell activation during aging. *Science* **359**, 1277–1283.
- 28 Stankov M, Panayotova-Dimitrova D, Leverkus M, Klusmann J-H & Behrens G (2014) Flow Cytometric Analysis of Autophagic Activity with Cyto-ID Staining in Primary Cells. *Bio-protocol* **4**, e1090–e1090.
- 29 Fazio TG, Huff JT & Panning B (2008) An RNAi screen of chromatin proteins identifies Tip60-p400 as a regulator of embryonic stem cell identity. *Cell* **134**, 162–174.
- 30 Kittler R, Putz G, Pelletier L, Poser I, Heninger A-K, Drechsel D, Fischer S, Konstantinova I, Habermann B, Grabner H, Yaspo M-L, Himmelbauer H, Korn B, Neugebauer K, Pisabarro MT & Buchholz F (2004) An endoribonuclease-prepared siRNA screen in human cells identifies genes essential for cell division. *Nature* **432**, 1036–1040.
- 31 Puri D, Koschorz B, Engist B, Onishi-Seebacher M, Ryan D, Soujanya M & Montavon T (2021) Foxd3 controls heterochromatin-mediated repression of repeat elements and 2-cell state transcription. *EMBO Rep* **22**, e53180.
- 32 Schüle KM, Leichsenring M, Andreani T, Vastolo V, Mallick M, Musheev MU, Karaulanov E & Niehrs C (2019) GADD45 promotes locus-specific DNA demethylation and 2C cycling in embryonic stem cells. *Genes Dev* **33**, 782–798.
- 33 Illingworth RS, Hölzenspies JJ, Roske FV, Bickmore WA & Brickman JM (2016) Polycomb enables primitive endoderm lineage priming in embryonic stem cells. *eLife* **5**, e14926.
- 34 Morey L, Pascual G, Cozzuto L, Roma G, Wutz A, Benitah SA & Di Croce L (2012) Nonoverlapping Functions of the Polycomb Group Cbx Family of Proteins in Embryonic Stem Cells. *Cell Stem Cell* **10**, 47–62.

- 35 Pasini D, Bracken AP, Hansen JB, Capillo M & Helin K (2007) The Polycomb Group Protein Suz12 Is Required for Embryonic Stem Cell Differentiation. *Molecular and Cellular Biology* **27**, 3769–3779.
- 36 Schoenfelder S, Sugar R, Dimond A, Javierre B-M, Armstrong H, Mifsud B, Dimitrova E, Matheson L, Tavares-Cadete F, Furlan-Magaril M, Segonds-Pichon A, Jurkowski W, Wingett SW, Tabbada K, Andrews S, Herman B, LeProust E, Osborne CS, Koseki H, Fraser P, Luscombe NM & Elderkin S (2015) Polycomb repressive complex PRC1 spatially constrains the mouse embryonic stem cell genome. *Nat Genet* **47**, 1179–1186.
- 37 Fujita J, Crane AM, Souza MK, Dejosez M, Kyba M, Flavell RA, Thomson JA & Zwaka TP (2008) Caspase Activity Mediates the Differentiation of Embryonic Stem Cells. *Cell Stem Cell* **2**, 595–601.
- 38 Niizuma H, Nakamura Y, Ozaki T, Nakanishi H, Ohira M, Isogai E, Kageyama H, Imaizumi M & Nakagawara A (2006) Bcl-2 is a key regulator for the retinoic acid-induced apoptotic cell death in neuroblastoma. *Oncogene* **25**, 5046–5055.
- 39 Clarke PG (1990) Developmental cell death: morphological diversity and multiple mechanisms. *Anat Embryol* **181**, 195–213.
- 40 Yeo W & Gautier J (2004) Early neural cell death: dying to become neurons. *Developmental Biology* **274**, 233–244.
- 41 Denton D & Kumar S (2019) Autophagy-dependent cell death. *Cell Death Differ* **26**, 605–616.
- 42 Kroemer G & Levine B (2008) Autophagic cell death: the story of a misnomer. *Nat Rev Mol Cell Biol* **9**, 1004–1010.
- 43 Klionsky DJ, Abdel-Aziz AK, Abdelfatah S, Abdellatif M, Abdoli A, Abel S, Abeliovich H, Abildgaard MH, Abudu YP, Acevedo-Arozena A, Adamopoulos IE, Adeli K, Adolph TE, Adornetto A, Aflaki E, Agam G, Agarwal A, Aggarwal BB, Agnello M, Agostinis P, Agrewala JN, Agrotis A, Aguilar PV, Ahmad ST, Ahmed ZM, Ahumada-Castro U, Aits S, Aizawa S, Akkoc Y, Akoumianaki T, Akpınar HA, Al-Abd AM, Al-Akra L, Al-Gharaibeh A, Alaoui-Jamali MA, Alberti S, Alcocer-Gómez E, Alessandri C, Ali M, Alim Al-Bari MA, Aliwaini S, Alizadeh J, Almacellas E, Almasan A, Alonso A, Alonso GD, Altan-Bonnet N, Altieri DC, Álvarez EMC, Alves S, Alves da Costa C, Alzaharna MM, Amadio M, Amantini C, Amaral C, Ambrosio S, Amer AO, Ammanathan V, An Z, Andersen SU, Andrabi SA, Andrade-Silva M, Andres AM, Angelini S, Ann D, Anozie UC, Ansari MY, Antas P, Antebi A, Antón Z, Anwar T, Apetoh L, Apostolova N, Araki T, Araki Y, Arasaki K, Araújo WL, Araya J, Arden C, Arévalo M-A, Arguelles S, Arias E, Arikath J, Arimoto H, Ariosa AR, Armstrong-James D, Arnauné-Pelloquin L, Aroca A, Arroyo DS, Arsov I, Artero R, Asaro DML, Aschner M, Ashrafizadeh M, Ashur-Fabian O, Atanasov AG, Au AK, Auberger P, Auner HW, Aurelian L, Autelli R, Avagliano L, Ávalos Y, Aveic S, Aveleira CA, Avin-Wittenberg T, Aydin Y, Ayton S, Ayyadevara S, Azzopardi M, Baba M, Backer JM, Backues SK, Bae D-H, Bae O-N, Bae SH, Baehrecke EH, Baek A, Baek S-H, Baek SH, Bagetta G, Bagniewska-Zadworna A, Bai H, Bai J, Bai X, Bai Y, Bairagi N, Baksi S, Balbi T, Baldari CT, Balduini W, Ballabio A, Ballester M, Balazadeh S, Balzan R, Bandopadhyay R, Banerjee S, Banerjee S, Bánréti Á, Bao Y, Baptista MS, Baracca A, Barbati C, Bargiela A, Barilà D, Barlow PG, Barmada SJ, Barreiro E, Barreto GE, Bartek J, Bartel B, Bartolome A, Barve GR, Basagoudanavar SH, Bassham DC, Bast RC, Basu A, Batoko H, Batten I, Baulieu EE, Baumgarner BL, Bayry J, Beale R, Beau I, Beaumatin F, Bechara LRG, Beck GR, Beers MF, Begun J, Behrends C, Behrens GMN, Bei R, Bejarano E, Bel S, Behl C, Belaid A, Belgareh-Touzé N, Bellarosa C, Belleudi F, Belló Pérez M, Bello-Morales R, Beltran JS de O, Beltran S, Benbrook DM, Bendorius M, Benitez BA, Benito-Cuesta I, Bensalem J, Berchtold MW, Berezowska S, Bergamaschi D, Bergami M, Bergmann A, Berliocchi L, Berlioz-Torrent C, Bernard A, Berthouix L, Besirli CG, Besteiro S, Betin VM, Beyaert R, Bezbradica JS, Bhaskar K, Bhatia-Kissova I, Bhattacharya R, Bhattacharya S, Bhattacharyya S, Bhuiyan MS, Bhutia SK, Bi L, Bi X, Biden TJ, Bijian K, Billes VA, Binart N, Bincoletto C, Birgisdottir AB, Bjorkoy G, Blanco G, Blas-Garcia A, Blasiak J, Blomgran R, Blomgren K, Blum JS, Boada-Romero E, Boban M, Boesze-Battaglia K, Boeuf P,

Boland B, Bomont P, Bonaldo P, Bonam SR, Bonfili L, Bonifacino JS, Boone BA, Bootman MD, Bordi M, Borner C, Bornhauser BC, Borthakur G, Bosch J, Bose S, Botana LM, Botas J, Boulanger CM, Boulton ME, Bourdenx M, Bourgeois B, Bourke NM, Bousquet G, Boya P, Bozhkov PV, Bozi LHM, Bozkurt TO, Brackney DE, Brandts CH, Braun RJ, Braus GH, Bravo-Sagua R, Bravo-San Pedro JM, Brest P, Bringer M-A, Briones-Herrera A, Broaddus VC, Brodersen P, Brodsky JL, Brody SL, Bronson PG, Bronstein JM, Brown CN, Brown RE, Brum PC, Brumell JH, Brunetti-Pierri N, Bruno D, Bryson-Richardson RJ, Bucci C, Buchrieser C, Bueno M, Buitrago-Molina LE, Buraschi S, Buch S, Buchan JR, Buckingham EM, Budak H, Budini M, Bultynck G, Burada F, Burgoyne JR, Burón MI, Bustos V, Büttner S, Butturini E, Byrd A, Cabas I, Cabrera-Benitez S, Cadwell K, Cai J, Cai L, Cai Q, Cairó M, Calbet JA, Caldwell GA, Caldwell KA, Call JA, Calvani R, Calvo AC, Calvo-Rubio Barrera M, Camara NO, Camonis JH, Camougrand N, Campanella M, Campbell EM, Campbell-Valois F-X, Campello S, Campesi I, Campos JC, Camuzard O, Cancino J, Candido de Almeida D, Canesi L, Caniggia I, Canonico B, Cantí C, Cao B, Caraglia M, Caramés B, Carchman EH, Cardenal-Muñoz E, Cardenas C, Cardenas L, Cardoso SM, Carew JS, Carle GF, Carleton G, Carloni S, Carmona-Gutierrez D, Carneiro LA, Carnevali O, Carosi JM, Carra S, Carrier A, Carrier L, Carroll B, Carter AB, Carvalho AN, Casanova M, Casas C, Casas J, Cassioli C, Castillo EF, Castillo K, Castillo-Lluva S, Castoldi F, Castori M, Castro AF, Castro-Caldas M, Castro-Hernandez J, Castro-Obregon S, Catz SD, Cavadas C, Cavaliere F, Cavallini G, Cavinato M, Cayuela ML, Cebollada Rica P, Cecarini V, Cecconi F, Cechowska-Pasko M, Cenci S, Ceperuelo-Mallafre V, Cerqueira JJ, Cerutti JM, Cervia D, Cetintas VB, Cetrullo S, Chae H-J, Chagin AS, Chai C-Y, Chakrabarti G, Chakrabarti O, Chakraborty T, Chakraborty T, Chami M, Chamilos G, Chan DW, Chan EYW, Chan ED, Chan HYE, Chan HH, Chan H, Chan MTV, Chan YS, Chandra PK, Chang C-P, Chang C, Chang H-C, Chang K, Chao J, Chapman T, Charlet-Berguerand N, Chatterjee S, Chaube SK, Chaudhary A, Chauhan S, Chaum E, Checler F, Cheetham ME, Chen C-S, Chen G-C, Chen J-F, Chen LL, Chen L, Chen L, Chen M, Chen M-K, Chen N, Chen Q, Chen R-H, Chen S, Chen W, Chen W, Chen X-M, Chen X-W, Chen X, Chen Y, Chen Y-G, Chen Y, Chen Y, Chen Y-J, Chen Y-Q, Chen ZS, Chen Z, Chen Z-H, Chen ZJ, Chen Z, Cheng H, Cheng J, Cheng S-Y, Cheng W, Cheng X, Cheng X-T, Cheng Y, Cheng Z, Chen Z, Cheong H, Cheong JK, Chernyak BV, Cherry S, Cheung CFR, Cheung CHA, Cheung K-H, Chevet E, Chi RJ, Chiang AKS, Chiaradonna F, Chiarelli R, Chiariello M, Chica N, Chiocca S, Chiong M, Chiou S-H, Chiramel AI, Chiurchiù V, Cho D-H, Choe S-K, Choi AMK, Choi ME, Choudhury KR, Chow NS, Chu CT, Chua JP, Chua JJE, Chung H, Chung KP, Chung S, Chung S-H, Chung Y-L, Cianfanelli V, Ciechomska IA, Cifuentes M, Cinque L, Cirak S, Cirone M, Clague MJ, Clarke R, Clementi E, Coccia EM, Codogno P, Cohen E, Cohen MM, Colasanti T, Colasuonno F, Colbert RA, Colell A, Čolić M, Coll NS, Collins MO, Colombo MI, Colón-Ramos DA, Combaret L, Comincini S, Cominetti MR, Consiglio A, Conte A, Conti F, Contu VR, Cookson MR, Coombs KM, Coppens I, Corasaniti MT, Corkery DP, Cordes N, Cortese K, Costa M do C, Costantino S, Costelli P, Coto-Montes A, Crack PJ, Crespo JL, Criollo A, Crippa V, Cristofani R, Csizmadia T, Cuadrado A, Cui B, Cui J, Cui Y, Cui Y, Culetto E, Cumino AC, Cybulsky AV, Czaja MJ, Czuczwar SJ, D'Adamo S, D'Amelio M, D'Arcangelo D, D'Lugos AC, D'Orazi G, da Silva JA, Dafsari HS, Dagda RK, Dagdas Y, Daglia M, Dai X, Dai Y, Dai Y, Dal Col J, Dalhaimer P, Dalla Valle L, Dallenga T, Dalmasso G, Damme M, Dando I, Dantuma NP, Darling AL, Das H, Dasarathy S, Dasari SK, Dash S, Daumke O, Dauphinee AN, Davies JS, Dávila VA, Davis RJ, Davis T, Dayalan Naidu S, De Amicis F, De Bosscher K, De Felice F, De Franceschi L, De Leonibus C, de Mattos Barbosa MG, De Meyer GRY, De Milito A, De Nunzio C, De Palma C, De Santi M, De Virgilio C, De Zio D, Debnath J, DeBosch BJ, Decuypere J-P, Deehan MA, Deflorian G, DeGregori J, Dehay B, Del Rio G, Delaney JR, Delbridge LMD, Delorme-Axford E, Delpino MV, Demarchi F, Dembitz V, Demers ND, Deng H, Deng Z, Dengjel J, Dent P, Denton D, DePamphilis ML, Der CJ, Deretic V, Descoteaux A, Devis L, Devkota S, Devuyst O, Dewson G, Dharmasivam M, Dhiman R, di Bernardo D, Di Cristina M, Di Domenico F, Di Fazio P, Di Fonzo A, Di Guardo G, Di Guglielmo GM, Di Leo L, Di Malta C, Di Nardo A, Di Rienzo M, Di

Sano F, Diallinas G, Diao J, Diaz-Araya G, Díaz-Laviada I, Dickinson JM, Diederich M, Dieudé M, Dikic I, Ding S, Ding W-X, Dini L, Dinić J, Dinic M, Dinkova-Kostova AT, Dionne MS, Distler JHW, Diwan A, Dixon IMC, Djavaheri-Mergny M, Dobrinski I, Dobrovinskaya O, Dobrowolski R, Dobson RCJ, Đokić J, Dokmeci Emre S, Donadelli M, Dong B, Dong X, Dong Z, Dorn li GW, Dotsch V, Dou H, Dou J, Dowaidar M, Dridi S, Drucker L, Du A, Du C, Du G, Du H-N, Du L-L, du Toit A, Duan S-B, Duan X, Duarte SP, Dubrovska A, Dunlop EA, Dupont N, Durán RV, Dwarakanath BS, Dyshlovoy SA, Ebrahimi-Fakhari D, Eckhart L, Edelstein CL, Efferth T, Eftekharpour E, Eichinger L, Eid N, Eisenberg T, Eissa NT, Eissa S, Ejarque M, El Andaloussi A, El-Hage N, El-Naggar S, Eleuteri AM, El-Shafey ES, Elgendy M, Eliopoulos AG, Elizalde MM, Elks PM, Elsasser H-P, Elsherbiny ES, Emerling BM, Emre NCT, Eng CH, Engedal N, Engelbrecht A-M, Engelsen AST, Enserink JM, Escalante R, Esclatine A, Escobar-Henriques M, Eskelinen E-L, Espert L, Eusebio M-O, Fabrias G, Fabrizi C, Facchiano A, Facchiano F, Fadeel B, Fader C, Faesen AC, Fairlie WD, Falcó A, Falkenburger BH, Fan D, Fan J, Fan Y, Fang EF, Fang Y, Fang Y, Fanto M, Farfel-Becker T, Faure M, Fazeli G, Fedele AO, Feldman AM, Feng D, Feng J, Feng L, Feng Y, Feng Y, Feng W, Fenz Araujo T, Ferguson TA, Fernández ÁF, Fernandez-Checa JC, Fernández-Veledo S, Fernie AR, Ferrante AW, Ferraresi A, Ferrari MF, Ferreira JCB, Ferro-Novick S, Figueras A, Filadi R, Filigheddu N, Filippi-Chiela E, Filomeni G, Fimia GM, Fineschi V, Finetti F, Finkbeiner S, Fisher EA, Fisher PB, Flamigni F, Fliesler SJ, Flo TH, Florance I, Florey O, Florio T, Fodor E, Follo C, Fon EA, Forlino A, Fornai F, Fortini P, Fracassi A, Fraldi A, Franco B, Franco R, Franconi F, Frankel LB, Friedman SL, Fröhlich LF, Frühbeck G, Fuentes JM, Fujiki Y, Fujita N, Fujiwara Y, Fukuda M, Fulda S, Furic L, Furuya N, Fusco C, Gack MU, Gaffke L, Galadari S, Galasso A, Galindo MF, Gallolu Kankanamalage S, Galluzzi L, Galy V, Gammoh N, Gan B, Ganley IG, Gao F, Gao H, Gao M, Gao P, Gao S-J, Gao W, Gao X, Garcera A, Garcia MN, Garcia VE, García-Del Portillo F, Garcia-Escudero V, Garcia-Garcia A, Garcia-Macia M, García-Moreno D, Garcia-Ruiz C, García-Sanz P, Garg AD, Gargini R, Garofalo T, Garry RF, Gassen NC, Gatica D, Ge L, Ge W, Geiss-Friedlander R, Gelfi C, Genschik P, Gentle IE, Gerbino V, Gerhardt C, Germain K, Germain M, Gewirtz DA, Ghasemipour Afshar E, Ghavami S, Ghigo A, Ghosh M, Giamas G, Giampietri C, Giatromanolaki A, Gibson GE, Gibson SB, Ginet V, Giniger E, Giorgi C, Girao H, Girardin SE, Giridharan M, Giuliano S, Giulivi C, Giuriato S, Giustiniani J, Gluschko A, Goder V, Goginashvili A, Golab J, Goldstone DC, Golebiewska A, Gomes LR, Gomez R, Gómez-Sánchez R, Gomez-Puerto MC, Gomez-Sintes R, Gong Q, Goni FM, González-Gallego J, Gonzalez-Hernandez T, Gonzalez-Polo RA, Gonzalez-Reyes JA, González-Rodríguez P, Goping IS, Gorbatyuk MS, Gorbunov NV, Görgülü K, Gorojod RM, Gorski SM, Goruppi S, Gotor C, Gottlieb RA, Gozes I, Gozuacik D, Graef M, Gräler MH, Granatiero V, Grasso D, Gray JP, Green DR, Greenhough A, Gregory SL, Griffin EF, Grinstaff MW, Gros F, Grose C, Gross AS, Gruber F, Grumati P, Grune T, Gu X, Guan J-L, Guardia CM, Guda K, Guerra F, Guerri C, Guha P, Guillén C, Gujar S, Gukovskaya A, Gukovsky I, Gunst J, Günther A, Guntur AR, Guo C, Guo C, Guo H, Guo L-W, Guo M, Gupta P, Gupta SK, Gupta S, Gupta VB, Gupta V, Gustafsson AB, Gutterman DD, H B R, Haapasalo A, Haber JE, Hać A, Hadano S, Hafrén AJ, Haidar M, Hall BS, Halldén G, Hamacher-Brady A, Hamann A, Hamasaki M, Han W, Hansen M, Hanson PI, Hao Z, Harada M, Harhaji-Trajkovic L, Hariharan N, Haroon N, Harris J, Hasegawa T, Hasima Nagoor N, Haspel JA, Haucke V, Hawkins WD, Hay BA, Haynes CM, Hayrabedian SB, Hays TS, He C, He Q, He R-R, He Y-W, He Y-Y, Heakal Y, Heberle AM, Hejtmancik JF, Helgason GV, Henkel V, Herb M, Hergovich A, Herman-Antosiewicz A, Hernández A, Hernandez C, Hernandez-Diaz S, Hernandez-Gea V, Herpin A, Herreros J, Hervás JH, Hesselton D, Hetz C, Heussler VT, Higuchi Y, Hilfiker S, Hill JA, Hlavacek WS, Ho EA, Ho IHT, Ho PW-L, Ho S-L, Ho WY, Hobbs GA, Hochstrasser M, Hoet PHM, Hofius D, Hofman P, Höhn A, Holmberg CI, Hombrebueno JR, Yi-Ren Hong C-WH, Hooper LV, Hoppe T, Horos R, Hoshida Y, Hsin I-L, Hsu H-Y, Hu B, Hu D, Hu L-F, Hu MC, Hu R, Hu W, Hu Y-C, Hu Z-W, Hua F, Hua J, Hua Y, Huan C, Huang C, Huang C, Huang C, Huang C, Huang H, Huang K, Huang MLH, Huang R, Huang S, Huang T, Huang X, Huang YJ, Huber TB, Hubert V, Hubner CA,



Hughes SM, Hughes WE, Humbert M, Hummer G, Hurley JH, Hussain S, Hussain S, Hussey PJ, Hutabarat M, Hwang H-Y, Hwang S, Ieni A, Ikeda F, Imagawa Y, Imai Y, Imbriano C, Imoto M, Inman DM, Inoki K, Iovanna J, Iozzo RV, Ippolito G, Irazoqui JE, Iribarren P, Ishaq M, Ishikawa M, Ishimwe N, Isidoro C, Ismail N, Issazadeh-Navikas S, Itakura E, Ito D, Ivankovic D, Ivanova S, Iyer AKV, Izquierdo JM, Izumi M, Jäättelä M, Jabir MS, Jackson WT, Jacobo-Herrera N, Jacomin A-C, Jacquin E, Jadiya P, Jaeschke H, Jagannath C, Jakobi AJ, Jakobsson J, Janji B, Jansen-Dürr P, Jansson PJ, Jantsch J, Januszewski S, Jasse A, Jean S, Jeltsch-David H, Jendelova P, Jenny A, Jensen TE, Jessen N, Jewell JL, Ji J, Jia L, Jia R, Jiang L, Jiang Q, Jiang R, Jiang T, Jiang X, Jiang Y, Jimenez-Sanchez M, Jin E-J, Jin F, Jin H, Jin L, Jin L, Jin M, Jin S, Jo E-K, Joffre C, Johansen T, Johnson GVW, Johnston SA, Jokitalo E, Jolly MK, Joosten LAB, Jordan J, Joseph B, Ju D, Ju J-S, Ju J, Juárez E, Judith D, Juhász G, Jun Y, Jung CH, Jung S-C, Jung YK, Jungbluth H, Jungverdorben J, Just S, Kaarniranta K, Kaasik A, Kabuta T, Kaganovich D, Kahana A, Kain R, Kajimura S, Kalamvoki M, Kalia M, Kalinowski DS, Kaludercic N, Kalvari I, Kaminska J, Kaminsky VO, Kanamori H, Kanasaki K, Kang C, Kang R, Kang SS, Kaniyappan S, Kanki T, Kanneganti T-D, Kanthasamy AG, Kanthasamy A, Kantorow M, Kapuy O, Karamouzis MV, Karim MR, Karmakar P, Katare RG, Kato M, Kaufmann SHE, Kauppinen A, Kaushal GP, Kaushik S, Kawasaki K, Kazan K, Ke P-Y, Keating DJ, Keber U, Kehrl JH, Keller KE, Keller CW, Kemper JK, Kenific CM, Kepp O, Kermorgant S, Kern A, Ketteler R, Keulers TG, Khalfin B, Khalil H, Khambu B, Khan SY, Khandelwal VKM, Khandia R, Kho W, Khobreakar NV, Khuansuwan S, Khundadze M, Killackey SA, Kim D, Kim DR, Kim D-H, Kim D-E, Kim EY, Kim E-K, Kim H-R, Kim H-S, Hyung-Ryong Kim null, Kim JH, Kim JK, Kim J-H, Kim J, Kim JH, Kim KI, Kim PK, Kim S-J, Kimball SR, Kimchi A, Kimmelman AC, Kimura T, King MA, Kinghorn KJ, Kinsey CG, Kirkin V, Kirshenbaum LA, Kiselev SL, Kishi S, Kitamoto K, Kitaoka Y, Kitazato K, Kitsis RN, Kittler JT, Kjaerulff O, Klein PS, Klopstock T, Klucken J, Knævelsrud H, Knorr RL, Ko BCB, Ko F, Ko J-L, Kobayashi H, Kobayashi S, Koch I, Koch JC, Koenig U, Kögel D, Koh YH, Koike M, Kohlwein SD, Kocaturk NM, Komatsu M, König J, Kono T, Kopp BT, Korcsmaros T, Korkmaz G, Korolchuk VI, Korsnes MS, Koskela A, Kota J, Kotake Y, Kotler ML, Kou Y, Koukourakis MI, Koustas E, Kovacs AL, Kovács T, Koya D, Kozako T, Kraft C, Krainc D, Krämer H, Krasnodembskaya AD, Kretz-Remy C, Kroemer G, Ktistakis NT, Kuchitsu K, Kuenen S, Kuerschner L, Kukar T, Kumar A, Kumar A, Kumar D, Kumar D, Kumar S, Kume S, Kumsta C, Kundu CN, Kundu M, Kunnnumakkara AB, Kurgan L, Kutateladze TG, Kutlu O, Kwak S, Kwon HJ, Kwon TK, Kwon YT, Kyrnizi I, La Spada A, Labonté P, Ladoire S, Laface I, Lafont F, Lagace DC, Lahiri V, Lai Z, Laird AS, Lakkaraju A, Lamark T, Lan S-H, Landajuella A, Lane DJR, Lane JD, Lang CH, Lange C, Langel Ü, Langer R, Lapaquette P, Laporte J, LaRusso NF, Lastres-Becker I, Lau WCY, Laurie GW, Lavandero S, Law BYK, Law HK-W, Layfield R, Le W, Le Stunff H, Leary AY, Lebrun J-J, Leck LYW, Leduc-Gaudet J-P, Lee C, Lee C-P, Lee D-H, Lee EB, Lee EF, Lee GM, Lee H-J, Lee HK, Lee JM, Lee JS, Lee J-A, Lee J-Y, Lee JH, Lee M, Lee MG, Lee MJ, Lee M-S, Lee SY, Lee S-J, Lee SY, Lee SB, Lee WH, Lee Y-R, Lee Y-H, Lee Y, Lefebvre C, Legouis R, Lei YL, Lei Y, Leikin S, Leitinger G, Lemus L, Leng S, Lenoir O, Lenz G, Lenz HJ, Lenzi P, León Y, Leopoldino AM, Leschczyk C, Leskelä S, Letellier E, Leung C-T, Leung PS, Leventhal JS, Levine B, Lewis PA, Ley K, Li B, Li D-Q, Li J, Li J, Li J, Li K, Li L, Li M, Li M, Li M, Li M, Li M, Li P-L, Li M-Q, Li Q, Li S, Li T, Li W, Li W, Li X, Li Y-P, Li Y, Li Z, Li Z, Lian J, Liang C, Liang Q, Liang W, Liang Y, Liang Y, Liao G, Liao L, Liao M, Liao Y-F, Librizzi M, Lie PPY, Lilly MA, Lim HJ, Lima TRR, Limana F, Lin C, Lin C-W, Lin D-S, Lin F-C, Lin JD, Lin KM, Lin K-H, Lin L-T, Lin P-H, Lin Q, Lin S, Lin S-J, Lin W, Lin X, Lin Y-X, Lin Y-S, Linden R, Lindner P, Ling S-C, Lingor P, Linnemann AK, Liou Y-C, Lipinski MM, Lipovšek S, Lira VA, Lisiak N, Liton PB, Liu C, Liu C-H, Liu C-F, Liu CH, Liu F, Liu H, Liu H-S, Liu H-F, Liu H, Liu J, Liu J, Liu J, Liu L, Liu L, Liu M, Liu Q, Liu W, Liu W, Liu X-H, Liu X, Liu X, Liu X, Liu X, Liu Y, Liu Y, Liu Y, Liu Y, Liu Y, Livingston JA, Lizard G, Lizcano JM, Ljubojevic-Holzer S, LLeonart ME, Llobet-Navàs D, Llorente A, Lo CH, Lobato-Márquez D, Long Q, Long YC, Loos B, Loos JA, López MG, López-Doménech G, López-Guerrero JA, López-Jiménez AT, López-Pérez Ó, López-Valero I, Lorenowicz MJ, Lorente M, Lorincz P, Lossi L, Lotersztajn S, Lovat PE, Lovell

JF, Lovy A, L w P, Lu G, Lu H, Lu J-H, Lu J-J, Lu M, Lu S, Luciani A, Lucocq JM, Ludovico P, Luftig MA, Luhr M, Luis-Ravelo D, Lum JJ, Luna-Dulcey L, Lund AH, Lund VK, L nemann JD, L ningschr r P, Luo H, Luo R, Luo S, Luo Z, Luparello C, L scher B, Luu L, Lyakhovich A, Lyamzaev KG, Lystad AH, Lytvynchuk L, Ma AC, Ma C, Ma M, Ma N-F, Ma Q-H, Ma X, Ma Y, Ma Z, MacDougald OA, Macian F, MacIntosh GC, MacKeigan JP, Macleod KF, Maday S, Madeo F, Madesh M, Madl T, Madrigal-Matute J, Maeda A, Maejima Y, Magarinos M, Mahavadi P, Maiani E, Maiese K, Maiti P, Maiuri MC, Majello B, Major MB, Makareeva E, Malik F, Mallilankaraman K, Malorni W, Maloyan A, Mammadova N, Man GCW, Manai F, Mancias JD, Mandelkew E-M, Mandell MA, Manfredi AA, Manjili MH, Manjithaya R, Manque P, Manshian BB, Manzano R, Manzoni C, Mao K, Marchese C, Marchetti S, Marconi AM, Marcucci F, Mardente S, Mareninova OA, Margeta M, Mari M, Marinelli S, Marinelli O, Mari o G, Mariotto S, Marshall RS, Marten MR, Martens S, Martin APJ, Martin KR, Martin S, Martin S, Mart n-Segura A, Mart n-Acebes MA, Martin-Burriel I, Martin-Rincon M, Martin-Sanz P, Martina JA, Martinet W, Martinez A, Martinez A, Martinez J, Martinez Velazquez M, Martinez-Lopez N, Martinez-Vicente M, Martins DO, Martins JO, Martins WK, Martins-Marques T, Marzetti E, Masaldan S, Masclaux-Daubresse C, Mashek DG, Massa V, Massieu L, Masson GR, Masuelli L, Masyuk AI, Masyuk TV, Matarrese P, Matheu A, Matoba S, Matsuzaki S, Mattar P, Matte A, Mattoscio D, Mauriz JL, Mauthe M, Mauvezin C, Maverakis E, Maycotte P, Mayer J, Mazzocchi G, Mazzoni C, Mazzulli JR, McCarty N, McDonald C, McGill MR, McKenna SL, McLaughlin B, McLoughlin F, McNiven MA, McWilliams TG, Mehta-Grigoriou F, Medeiros TC, Medina DL, Megeney LA, Megyeri K, Mehrpour M, Mehta JL, Meijer AJ, Meijer AH, Mejlvang J, Mel ndez A, Melk A, Memisoglu G, Mendes AF, Meng D, Meng F, Meng T, Menna-Barreto R, Menon MB, Mercer C, Mercier AE, Mergny J-L, Merighi A, Merkley SD, Merla G, Meske V, Mestre AC, Metur SP, Meyer C, Meyer H, Mi W, Mialet-Perez J, Miao J, Micale L, Miki Y, Milan E, Milczarek M, Miller DL, Miller SI, Miller S, Millward SW, Milosevic I, Minina EA, Mirzaei H, Mirzaei HR, Mirzaei M, Mishra A, Mishra N, Mishra PK, Misirkic Marjanovic M, Misasi R, Misra A, Misso G, Mitchell C, Mitou G, Miura T, Miyamoto S, Miyazaki M, Miyazaki M, Miyazaki T, Miyazawa K, Mizushima N, Mogensen TH, Mograbi B, Mohammadinejad R, Mohamud Y, Mohanty A, Mohapatra S, M hlmann T, Mohmmmed A, Moles A, Moley KH, Molinari M, Mollace V, M ller AB, Mollereau B, Mollinedo F, Montagna C, Monteiro MJ, Montella A, Montes LR, Montico B, Mony VK, Monzio Compagnoni G, Moore MN, Moosavi MA, Mora AL, Mora M, Morales-Alamo D, Moratalla R, Moreira PI, Morelli E, Moreno S, Moreno-Blas D, Moresi V, Morga B, Morgan AH, Morin F, Morishita H, Moritz OL, Moriyama M, Moriyasu Y, Morleo M, Morselli E, Moruno-Manchon JF, Moscat J, Mostowy S, Motori E, Moura AF, Moustaid-Moussa N, Mrakovcic M, Muci o-Hern ndez G, Mukherjee A, Mukhopadhyay S, Mulcahy Levy JM, Mulero V, Muller S, M nch C, Munjal A, Munoz-Canoves P, Mu oz-Galdeano T, M nz C, Murakawa T, Muratori C, Murphy BM, Murphy JP, Murthy A, My h nen TT, Mysorekar IU, Mytych J, Nabavi SM, Nabissi M, Nagy P, Nah J, Nahimana A, Nakagawa I, Nakamura K, Nakatogawa H, Nandi SS, Nanjundan M, Nanni M, Napolitano G, Nardacci R, Narita M, Nassif M, Nathan I, Natsumeda M, Naude RJ, Naumann C, Naveiras O, Navid F, Nawrocki ST, Nazarko TY, Nazio F, Negoita F, Neill T, Neisch AL, Neri LM, Netea MG, Neubert P, Neufeld TP, Neumann D, Neutzner A, Newton PT, Ney PA, Nezis IP, Ng CCW, Ng TB, Nguyen HTT, Nguyen LT, Ni H-M, N  Cheallaigh C, Ni Z, Nicolao MC, Nicoli F, Nieto-Diaz M, Nilsson P, Ning S, Niranjana R, Nishimune H, Niso-Santano M, Nixon RA, Nobili A, Nobrega C, Noda T, Nogueira-Recalde U, Nolan TM, Nombela I, Novak I, Novoa B, Nozawa T, Nukina N, Nussbaum-Krammer C, Nylandsted J, O'Donovan TR, O'Leary SM, O'Rourke EJ, O'Sullivan MP, O'Sullivan TE, Oddo S, Oehme I, Ogawa M, Ogier-Denis E, Ogmundsdottir MH, Ogretmen B, Oh GT, Oh S-H, Oh YJ, Ohama T, Ohashi Y, Ohmuraya M, Oikonomou V, Ojha R, Okamoto K, Okazawa H, Oku M, Oliv n S, Oliveira JMA, Ollmann M, Olzmann JA, Omari S, Omary MB,  nal G, Ondrej M, Ong S-B, Ong S-G, Onnis A, Orellana JA, Orellana-Mu oz S, Ortega-Villaizan MDM, Ortiz-Gonzalez XR, Ortona E, Osiewacz HD, Osman

A-HK, Osta R, Otegui MS, Otsu K, Ott C, Ottobriani L, Ou J-HJ, Outeiro TF, Oynebraten I, Ozturk M, Pagès G, Pahari S, Pajares M, Pajvani UB, Pal R, Paladino S, Pallet N, Palmieri M, Palmisano G, Palumbo C, Pampaloni F, Pan L, Pan Q, Pan W, Pan X, Panasyuk G, Pandey R, Pandey UB, Pandya V, Paneni F, Pang SY, Panzarini E, Papademetrio DL, Papaleo E, Papinski D, Papp D, Park EC, Park HT, Park J-M, Park J-I, Park JT, Park J, Park SC, Park S-Y, Parola AH, Parys JB, Pasquier A, Pasquier B, Passos JF, Pastore N, Patel HH, Patschan D, Patingre S, Pedraza-Alva G, Pedraza-Chaverri J, Pedrozo Z, Pei G, Pei J, Peled-Zehavi H, Pellegrini JM, Pelletier J, Peñalva MA, Peng D, Peng Y, Penna F, Pennuto M, Pentimalli F, Pereira CM, Pereira GJS, Pereira LC, Pereira de Almeida L, Perera ND, Pérez-Lara Á, Perez-Oliva AB, Pérez-Pérez ME, Periyasamy P, Perl A, Perrotta C, Perrotta I, Pestell RG, Petersen M, Petrache I, Petrovski G, Pfirrmann T, Pfister AS, Philips JA, Pi H, Picca A, Pickrell AM, Picot S, Pierantoni GM, Pierdominici M, Pierre P, Pierrefite-Carle V, Pierzynowska K, Pietrocola F, Pietruczuk M, Pignata C, Pimentel-Muiños FX, Pinar M, Pinheiro RO, Pinkas-Kramarski R, Pinton P, Piracs K, Piya S, Pizzo P, Plantinga TS, Platta HW, Plaza-Zabala A, Plomann M, Plotnikov EY, Plun-Favreau H, Pluta R, Pocock R, Pöggeler S, Pohl C, Poirot M, Poletti A, Ponpuak M, Popelka H, Popova B, Porta H, Porte Alcon S, Portilla-Fernandez E, Post M, Potts MB, Poulton J, Powers T, Prahlad V, Prajsnar TK, Praticò D, Prencipe R, Priaault M, Proikas-Cezanne T, Promponas VJ, Proud CG, Puertollano R, Puglielli L, Pulinilkunnit T, Puri D, Puri R, Puyal J, Qi X, Qi Y, Qian W, Qiang L, Qiu Y, Quadrilatero J, Quarleri J, Raben N, Rabinowich H, Ragona D, Ragusa MJ, Rahimi N, Rahmati M, Raia V, Raimundo N, Rajasekaran N-S, Ramachandra Rao S, Rami A, Ramírez-Pardo I, Ramsden DB, Randow F, Rangarajan PN, Ranieri D, Rao H, Rao L, Rao R, Rathore S, Ratnayaka JA, Ratovitski EA, Ravanan P, Ravegnini G, Ray SK, Razani B, Rebecca V, Reggiori F, Régnier-Vigouroux A, Reichert AS, Reigada D, Reiling JH, Rein T, Reipert S, Rekha RS, Ren H, Ren J, Ren W, Renault T, Renga G, Reue K, Rewitz K, Ribeiro de Andrade Ramos B, Riazuddin SA, Ribeiro-Rodrigues TM, Ricci J-E, Ricci R, Riccio V, Richardson DR, Rikihisa Y, Risbud MV, Risueño RM, Ritis K, Rizza S, Rizzuto R, Roberts HC, Roberts LD, Robinson KJ, Roccheri MC, Rocchi S, Rodney GG, Rodrigues T, Rodrigues Silva VR, Rodriguez A, Rodriguez-Barrueco R, Rodriguez-Henche N, Rodriguez-Rocha H, Roelofs J, Rogers RS, Rogov VV, Rojo AI, Rolka K, Romanello V, Romani L, Romano A, Romano PS, Romeo-Guitart D, Romero LC, Romero M, Roney JC, Rongo C, Roperto S, Rosenfeldt MT, Rosenstiel P, Rosenwald AG, Roth KA, Roth L, Roth S, Rouschop KMA, Roussel BD, Roux S, Rovere-Querini P, Roy A, Rozieres A, Ruano D, Rubinsztein DC, Rubtsova MP, Ruckdeschel K, Ruckenstuhl C, Rudolf E, Rudolf R, Ruggieri A, Ruparelia AA, Rusmini P, Russell RR, Russo GL, Russo M, Russo R, Ryabaya OO, Ryan KM, Ryu K-Y, Sabater-Arcis M, Sachdev U, Sacher M, Sachse C, Sadhu A, Sadoshima J, Safren N, Saftig P, Sagona AP, Sahay G, Sahebkar A, Sahin M, Sahin O, Sahni S, Saito N, Saito S, Saito T, Sakai R, Sakai Y, Sakamaki J-I, Saksela K, Salazar G, Salazar-Degracia A, Salekdeh GH, Saluja AK, Sampaio-Marques B, Sanchez MC, Sanchez-Alcazar JA, Sanchez-Vera V, Sancho-Shimizu V, Sanderson JT, Sandri M, Santaguida S, Santambrogio L, Santana MM, Santoni G, Sanz A, Sanz P, Saran S, Sardiello M, Sargeant TJ, Sarin A, Sarkar C, Sarkar S, Sarrias M-R, Sarkar S, Sarmah DT, Sarparanta J, Sathyanarayan A, Sathyanarayanan R, Scaglione KM, Scatozza F, Schaefer L, Schafer ZT, Schaible UE, Schapira AHV, Scharl M, Schatzl HM, Schein CH, Scheper W, Scheuring D, Schiaffino MV, Schiappacassi M, Schindl R, Schlattner U, Schmidt O, Schmitt R, Schmidt SD, Schmitz I, Schmukler E, Schneider A, Schneider BE, Schober R, Schoijet AC, Schott MB, Schramm M, Schröder B, Schuh K, Schüller C, Schulze RJ, Schürmanns L, Schwamborn JC, Schwarten M, Scialo F, Sciarretta S, Scott MJ, Scotto KW, Scovassi AI, Scrima A, Scivo A, Sebastian D, Sebti S, Sedej S, Segatori L, Segev N, Seglen PO, Seilliez I, Seki E, Selleck SB, Sellke FW, Selsby JT, Sendtner M, Senturk S, Seranova E, Sergi C, Serra-Moreno R, Sesaki H, Settembre C, Setty SRG, Sgarbi G, Sha O, Shacka JJ, Shah JA, Shang D, Shao C, Shao F, Sharbati S, Sharkey LM, Sharma D, Sharma G, Sharma K, Sharma P, Sharma S, Shen H-M, Shen H, Shen J, Shen M, Shen W, Shen Z, Sheng R, Sheng Z, Sheng Z-H, Shi J, Shi X, Shi Y-H, Shiba-Fukushima K, Shieh J-J, Shimada Y, Shimizu S,



Shimozawa M, Shintani T, Shoemaker CJ, Shojaei S, Shoji I, Shravage BV, Shridhar V, Shu C-W, Shu H-B, Shui K, Shukla AK, Shutt TE, Sica V, Siddiqui A, Sierra A, Sierra-Torre V, Signorelli S, Sil P, Silva BJ de A, Silva JD, Silva-Pavez E, Silvente-Poirot S, Simmonds RE, Simon AK, Simon H-U, Simons M, Singh A, Singh LP, Singh R, Singh SV, Singh SK, Singh SB, Singh S, Singh SP, Sinha D, Sinha RA, Sinha S, Sirko A, Sirohi K, Sivridis EL, Skendros P, Skiryicz A, Slaninová I, Smaili SS, Smertenko A, Smith MD, Soenen SJ, Sohn EJ, Sok SPM, Solaini G, Soldati T, Soleimanpour SA, Soler RM, Solovchenko A, Somarelli JA, Sonawane A, Song F, Song HK, Song J-X, Song K, Song Z, Soria LR, Sorice M, Soukas AA, Soukup S-F, Sousa D, Sousa N, Spagnuolo PA, Spector SA, Srinivas Bharath MM, St Clair D, Stagni V, Staiano L, Stalneck CA, Stankov MV, Stathopoulos PB, Stefan K, Stefan SM, Stefanis L, Steffan JS, Steinkasserer A, Stenmark H, Sternecker J, Stevens C, Stoka V, Storch S, Stork B, Strappazon F, Strohecker AM, Stupack DG, Su H, Su L-Y, Su L, Suarez-Fontes AM, Subauste CS, Subbian S, Subirada PV, Sudhandiran G, Sue CM, Sui X, Summers C, Sun G, Sun J, Sun K, Sun M-X, Sun Q, Sun Y, Sun Z, Sunahara KKS, Sundberg E, Susztak K, Sutovsky P, Suzuki H, Sweeney G, Symons JD, Sze SCW, Szewczyk NJ, Tabęcka-Łonczynska A, Tabolacci C, Tacke F, Taegtmeier H, Tafani M, Tagaya M, Tai H, Tait SWG, Takahashi Y, Takats S, Talwar P, Tam C, Tam SY, Tampellini D, Tamura A, Tan CT, Tan E-K, Tan Y-Q, Tanaka M, Tanaka M, Tang D, Tang J, Tang T-S, Tanida I, Tao Z, Taouis M, Tatenhorst L, Tavernarakis N, Taylor A, Taylor GA, Taylor JM, Tchetina E, Tee AR, Tegeder I, Teis D, Teixeira N, Teixeira-Clerc F, Tekirdag KA, Tencomnao T, Tenreiro S, Tepikin AV, Testillano PS, Tettamanti G, Tharaux P-L, Thedieck K, Thekkinghat AA, Thellung S, Thinwa JW, Thirumalaikumar VP, Thomas SM, Thomes PG, Thorburn A, Thukral L, Thum T, Thumm M, Tian L, Tichy A, Till A, Timmerman V, Titorenko VI, Todi SV, Todorova K, Toivonen JM, Tomaipitnca L, Tomar D, Tomas-Zapico C, Tomić S, Tong BC-K, Tong C, Tong X, Tooze SA, Torgersen ML, Torii S, Torres-López L, Torriglia A, Towers CG, Towns R, Toyokuni S, Trajkovic V, Tramontano D, Tran Q-G, Travassos LH, Trelford CB, Tremel S, Trougakos IP, Tsao BP, Tschan MP, Tse H-F, Tse TF, Tsugawa H, Tsvetkov AS, Tumbarello DA, Tumtas Y, Tuñón MJ, Turcotte S, Turk B, Turk V, Turner BJ, Tuxworth RI, Tyler JK, Tyutereva EV, Uchiyama Y, Ugun-Klusek A, Uhlig HH, Ułamek-Kozioł M, Ulasov IV, Umekawa M, Ungermann C, Unno R, Urbe S, Uribe-Carretero E, Üstün S, Uversky VN, Vaccari T, Vaccaro MI, Vahsen BF, Vakifahmetoglu-Norberg H, Valdor R, Valente MJ, Valko A, Vallee RB, Valverde AM, Van den Berghe G, van der Veen S, Van Kaer L, van Loosdregt J, van Wijk SJL, Vandenbergh W, Vanhorebeek I, Vannier-Santos MA, Vannini N, Vanrell MC, Vantaggiato C, Varano G, Varela-Nieto I, Varga M, Vasconcelos MH, Vats S, Vavvas DG, Vega-Naredo I, Vega-Rubin-de-Celis S, Velasco G, Velázquez AP, Vellai T, Vellenga E, Velotti F, Verdier M, Verginis P, Vergne I, Verkade P, Verma M, Verstreken P, Vervliet T, Vervoorts J, Vessoni AT, Victor VM, Vidal M, Vidoni C, Vieira OV, Vierstra RD, Viganó S, Vihinen H, Vijayan V, Vila M, Vilar M, Villalba JM, Villalobo A, Villarejo-Zori B, Villarroya F, Villarroya J, Vincent O, Vindis C, Viret C, Viscomi MT, Visnjic D, Vitale I, Vocadlo DJ, Voitsekhovskaja OV, Volonté C, Volta M, Vomero M, Von Haefen C, Vooijs MA, Voos W, Vucicevic L, Wade-Martins R, Waguri S, Waite KA, Wakatsuki S, Walker DW, Walker MJ, Walker SA, Walter J, Wandosell FG, Wang B, Wang C-Y, Wang C, Wang C, Wang C, Wang C-Y, Wang D, Wang F, Wang F, Wang F, Wang G, Wang H, Wang H, Wang H, Wang H-G, Wang J, Wang J, Wang J, Wang J, Wang K, Wang L, Wang L, Wang MH, Wang M, Wang N, Wang P, Wang P, Wang P, Wang P, Wang QJ, Wang Q, Wang QK, Wang QA, Wang W-T, Wang W, Wang X, Wang X, Wang Y, Wang Y, Wang Y, Wang Y-Y, Wang Y, Wang Y, Wang Y, Wang Y, Wang Z, Wang Z, Wang Z, Warnes G, Warnsmann V, Watada H, Watanabe E, Watchon M, Wawrzyńska A, Weaver TE, Wegrzyn G, Wehman AM, Wei H, Wei L, Wei T, Wei Y, Weiergräber OH, Wehl CC, Weindl G, Weiskirchen R, Wells A, Wen RH, Wen X, Werner A, Weykopf B, Wheatley SP, Whitton JL, Whitworth AJ, Wiktorska K, Wildenberg ME, Wileman T, Wilkinson S, Willbold D, Williams B, Williams RSB, Williams RL, Williamson PR, Wilson RA, Winner B, Winsor NJ, Witkin SS, Wodrich H, Woehlbier U, Wollert T, Wong E, Wong JH, Wong RW, Wong VKW, Wong WW-L, Wu A-G, Wu C, Wu J, Wu J, Wu J, Wu KK, Wu M,

- Wu S-Y, Wu S, Wu S-Y, Wu S, Wu WKK, Wu X, Wu X, Wu Y-W, Wu Y, Xavier RJ, Xia H, Xia L, Xia Z, Xiang G, Xiang J, Xiang M, Xiang W, Xiao B, Xiao G, Xiao H, Xiao H-T, Xiao J, Xiao L, Xiao S, Xiao Y, Xie B, Xie C-M, Xie M, Xie Y, Xie Z, Xie Z, Xilouri M, Xu C, Xu E, Xu H, Xu J, Xu J, Xu L, Xu WW, Xu X, Xue Y, Yakhine-Diop SMS, Yamaguchi M, Yamaguchi O, Yamamoto A, Yamashina S, Yan S, Yan S-J, Yan Z, Yanagi Y, Yang C, Yang D-S, Yang H, Yang H-T, Yang H, Yang J-M, Yang J, Yang J, Yang L, Yang L, Yang M, Yang P-M, Yang Q, Yang S, Yang S, Yang S-F, Yang W, Yang WY, Yang X, Yang X, Yang Y, Yang Y, Yao H, Yao S, Yao X, Yao Y-G, Yao Y-M, Yasui T, Yazdankhah M, Yen PM, Yi C, Yin X-M, Yin Y, Yin Z, Yin Z, Ying M, Ying Z, Yip CK, Yiu SPT, Yoo YH, Yoshida K, Yoshii SR, Yoshimori T, Yousefi B, Yu B, Yu H, Yu J, Yu J, Yu L, Yu M-L, Yu S-W, Yu VC, Yu WH, Yu Z, Yu Z, Yuan J, Yuan L-Q, Yuan S, Yuan S-SF, Yuan Y, Yuan Z, Yue J, Yue Z, Yun J, Yung RL, Zacks DN, Zaffagnini G, Zambelli VO, Zanella I, Zang QS, Zanivan S, Zappavigna S, Zaragoza P, Zarbalis KS, Zarebkohan A, Zarrouk A, Zeitlin SO, Zeng J, Zeng J-D, Žerovnik E, Zhan L, Zhang B, Zhang DD, Zhang H, Zhang H-L, Zhang J, Zhang J, Zhang J-P, Zhang KYB, Zhang LW, Zhang L, Zhang L, Zhang L, Zhang L, Zhang M, Zhang P, Zhang S, Zhang W, Zhang X, Zhang X-W, Zhang X, Zhang X, Zhang X, Zhang X, Zhang XD, Zhang Y, Zhang Y, Zhang Y, Zhang Y-D, Zhang Y, Zhang Y-Y, Zhang Y, Zhang Z, Zhao H, Zhao L, Zhao S, Zhao T, Zhao X-F, Zhao Y, Zhao Y, Zhao Y, Zhao Y, Zheng G, Zheng K, Zheng L, Zheng S, Zheng X-L, Zheng Y, Zheng Z-G, Zhivotovsky B, Zhong Q, Zhou A, Zhou B, Zhou C, Zhou G, Zhou H, Zhou H, Zhou H, Zhou J, Zhou J, Zhou J, Zhou J, Zhou K, Zhou R, Zhou X-J, Zhou Y, Zhou Y, Zhou Y, Zhou Z-Y, Zhou Z, Zhu B, Zhu C, Zhu G-Q, Zhu H, Zhu H, Zhu H, Zhu W-G, Zhu Y, Zhu Y, Zhuang H, Zhuang X, Zientara-Rytter K, Zimmermann CM, Ziviani E, Zoladek T, Zong W-X, Zorov DB, Zorzano A, Zou W, Zou Z, Zou Z, Zuryn S, Zwerschke W, Brand-Saberi B, Dong XC, Kenchappa CS, Li Z, Lin Y, Oshima S, Rong Y, Sluimer JC, Stallings CL & Tong C-K (2021) Guidelines for the use and interpretation of assays for monitoring autophagy (4th edition)1. *Autophagy* **17**, 1–382.
- 44 Galluzzi L, Baehrecke EH, Ballabio A, Boya P, Bravo-San Pedro JM, Cecconi F, Choi AM, Chu CT, Codogno P, Colombo MI, Cuervo AM, Debnath J, Deretic V, Dikic I, Eskelinen E, Fimia GM, Fulda S, Gewirtz DA, Green DR, Hansen M, Harper JW, Jäättelä M, Johansen T, Juhasz G, Kimmelman AC, Kraft C, Ktistakis NT, Kumar S, Levine B, Lopez-Otin C, Madeo F, Martens S, Martinez J, Melendez A, Mizushima N, Münz C, Murphy LO, Penninger JM, Piacentini M, Reggiori F, Rubinsztein DC, Ryan KM, Santambrogio L, Scorrano L, Simon AK, Simon H, Simonsen A, Tavernarakis N, Tooze SA, Yoshimori T, Yuan J, Yue Z, Zhong Q & Kroemer G (2017) Molecular definitions of autophagy and related processes. *EMBO J* **36**, 1811–1836.
- 45 Verma SK, Tian X, LaFrance LV, Duquette C, Suarez DP, Newlander KA, Romeril SP, Burgess JL, Grant SW, Brackley JA, Graves AP, Scherzer DA, Shu A, Thompson C, Ott HM, Aller GSV, Machutta CA, Diaz E, Jiang Y, Johnson NW, Knight SD, Kruger RG, McCabe MT, Dhanak D, Tummino PJ, Creasy CL & Miller WH (2012) Identification of Potent, Selective, Cell-Active Inhibitors of the Histone Lysine Methyltransferase EZH2. *ACS Med Chem Lett* **3**, 1091–1096.
- 46 Transcriptional regulation by Polycomb group proteins | Nature Structural & Molecular Biology
- 47 Lu T, Zhu Z, Wu J, She H, Han R, Xu H & Qin Z-H (2019) DRAM1 regulates autophagy and cell proliferation via inhibition of the phosphoinositide 3-kinase-Akt-mTOR-ribosomal protein S6 pathway. *Cell Communication and Signaling* **17**, 28.
- 48 Crighton D, Wilkinson S, O’Prey J, Syed N, Smith P, Harrison PR, Gasco M, Garrone O, Crook T & Ryan KM (2006) DRAM, a p53-Induced Modulator of Autophagy, Is Critical for Apoptosis. *Cell* **126**, 121–134.
- 49 Guan J-J, Zhang X-D, Sun W, Qi L, Wu J-C & Qin Z-H (2015) DRAM1 regulates apoptosis through increasing protein levels and lysosomal localization of BAX. *Cell Death Dis* **6**, e1624–e1624.
- 50 Polycomb Repressive Complex 1 Generates Discrete Compacted Domains that Change during Differentiation - PubMed

- 51 Ferrari F, Arrigoni L, Franz H, Izzo A, Butenko L, Trompouki E, Vogel T & Manke T (2020) DOT1L-mediated murine neuronal differentiation associates with H3K79me2 accumulation and preserves SOX2-enhancer accessibility. *Nat Commun* **11**, 5200.
- 52 Bernstein BE, Mikkelsen TS, Xie X, Kamal M, Huebert DJ, Cuff J, Fry B, Meissner A, Wernig M, Plath K, Jaenisch R, Wagschal A, Feil R, Schreiber SL & Lander ES (2006) A bivalent chromatin structure marks key developmental genes in embryonic stem cells. *Cell* **125**, 315–326.
- 53 Vázquez P, Arroba AI, Cecconi F, Rosa EJ de la, Boya P & Pablo FD (2012) Atg5 and Ambra1 differentially modulate neurogenesis in neural stem cells. *Autophagy* **8**, 187–199.
- 54 Zeng M & Zhou J-N (2008) Roles of autophagy and mTOR signaling in neuronal differentiation of mouse neuroblastoma cells. *Cellular Signalling* **20**, 659–665.
- 55 Grunwald DS, Otto NM, Park J-M, Song D & Kim D-H (2020) GABARAPs and LC3s have opposite roles in regulating ULK1 for autophagy induction. *Autophagy* **16**, 600–614.
- 56 Zhang X-D, Qi L, Wu J-C & Qin Z-H (2013) DRAM1 Regulates Autophagy Flux through Lysosomes. *PLOS ONE* **8**, e63245.
- 57 Tra T, Gong L, Kao L-P, Li X-L, Grandela C, Devenish RJ, Wolvetang E & Prescott M (2011) Autophagy in Human Embryonic Stem Cells. *PLOS ONE* **6**, e27485.
- 58 Zhang J, Liu J, Liu L, McKeehan WL & Wang F (2012) The fibroblast growth factor signaling axis controls cardiac stem cell differentiation through regulating autophagy. *Autophagy* **8**, 690–691.
- 59 Salemi S, Yousefi S, Constantinescu MA, Fey MF & Simon H-U (2012) Autophagy is required for self-renewal and differentiation of adult human stem cells. *Cell Res* **22**, 432–435.
- 60 Phadwal K, Watson AS & Simon AK (2013) Tightrope act: autophagy in stem cell renewal, differentiation, proliferation, and aging. *Cell Mol Life Sci* **70**, 89–103.
- 61 Chen T-Q, Hu N, Huo B, Masau JF, Yi X, Zhong X-X, Chen Y-J, Guo X, Zhu X-H, Wei X & Jiang D-S (2020) EHMT2/G9a Inhibits Aortic Smooth Muscle Cell Death by Suppressing Autophagy Activation. *Int J Biol Sci* **16**, 1252–1263.
- 62 De Smedt E, Devin J, Muylaert C, Robert N, Requirand G, Vlummens P, Vincent L, Cartron G, Maes K, Moreaux J & De Bruyne E (2021) G9a/GLP targeting in MM promotes autophagy-associated apoptosis and boosts proteasome inhibitor-mediated cell death. *Blood Advances* **5**, 2325–2338.
- 63 An PNT, Shimaji K, Tanaka R, Yoshida H, Kimura H, Fukusaki E & Yamaguchi M (2017) Epigenetic regulation of starvation-induced autophagy in *Drosophila* by histone methyltransferase G9a. *Sci Rep* **7**, 7343.
- 64 Li F, Yang C, Zhang H, Ma J, Jia J, Tang X, Zeng J, Chong T, Wang X, He D & Guo P (2019) BET inhibitor JQ1 suppresses cell proliferation via inducing autophagy and activating LKB1/AMPK in bladder cancer cells. *Cancer Med* **8**, 4792–4805.
- 65 Li Y, Xiang J, Zhang J, Lin J, Wu Y & Wang X (2020) Inhibition of Brd4 by JQ1 Promotes Functional Recovery From Spinal Cord Injury by Activating Autophagy. *Frontiers in Cellular Neuroscience* **14**, 292.
- 66 Xu C, Wang X, Zhou Y, Chen FX, Wang H, Li K, Fan H, Tang X, Jiang G & Zhang J (2019) Synergy between arsenic trioxide and JQ1 on autophagy in pancreatic cancer. *Oncogene* **38**, 7249–7265.
- 67 Luan W, Pang Y, Li R, Wei X, Jiao X, Shi J, Yu J, Mao H & Liu P (2019) Akt/mTOR-Mediated Autophagy Confers Resistance To BET Inhibitor JQ1 In Ovarian Cancer. *Onco Targets Ther* **12**, 8063–8074.
- 68 Xiao W, Zhou Q, Wen X, Wang R, Liu R, Wang T, Shi J, Hu Y & Hou J (2021) Small-Molecule Inhibitors Overcome Epigenetic Reprogramming for Cancer Therapy. *Frontiers in Pharmacology* **12**.

## **Figure Legends:**

### **Figure 1: Autophagy is induced during RA-mediated differentiation of mESCs.**

1a: GFP and mCherry positive puncta in LC3-tagged-ES cells (Top panel), and RA-treated cells (Bottom panel). Nuclei are labelled with DAPI. Scale bar =10 $\mu$ m. 1b: Quantitation of GFP and mCherry positive puncta in mESCs and RA-treated cells. Y axis represents average puncta per cell. N=150 cells. Error bar indicates standard error of the mean (SEM).

1c: Immunoblot depicting LC3I and LC3II in mESCs and RA-treated cells.  $\alpha$  tubulin is used as loading control. 1d: Quantitation of immunoblot in mESCs and RA- treated cells. After quantification of band intensity, LC3II/LC3I levels were normalised to  $\alpha$  tubulin levels. N=3 biological replicates. Asterisks indicate statistically significant differences compared to ES (\*:  $p < 0.05$ , paired t-test). 1e: Gene expression analysis of autophagy genes in mESCs, EB day 8 (ES medium-LIF), EB day 8 (RA) and RA treated cells day 6 (N2B27 medium, monolayer). Scale bar represents fold change. Data is presented as a heatmap depicting average fold change normalised to mESCs. The heatmap was plotted using Morpheus, <https://software.broadinstitute.org/morpheus> 1f: RT-qPCR analysis of autophagy genes in mESCs and RA-treated cells. Y axis represents fold change wrt *Gapdh* normalised to mESCs. N=3 biological replicates. Error bar indicates standard error of the mean (SEM).

### **Figure 2: Autophagy is regulated by epigenetic pathways in mESCs.**

2a: GFP intensity depicting autophagy levels in mESCs and cells treated with epigenetic inhibitors. Y axis depicts relative fluorescence intensity normalised to mESCs. N=3.biologocal replicates. Error bar indicates standard error of the mean (SEM). Asterisks indicate statistically significant differences compared to ES+LIF (\*:  $p < 0.05$ , \*\*:  $p < 0.005$ ; paired t-test). 2b: GFP and mCherry positive puncta in ES cells (Top panel) and cells treated with epigenetic inhibitors (Bottom panels). Nuclei are labelled with DAPI. Scale bar =10 $\mu$ m. 2c: Quantitation of GFP and mCherry puncta in mESCs and cells treated with epigenetic inhibitors. Y axis represents average puncta per cell. N=150 cells. 2d: Expression of autophagy genes in mESCs and cells treated with epigenetic inhibitors. Data is presented as a heatmap

depicting average fold change normalised to mESCs. N=3. The heatmap was plotted using Morpheus, <https://software.broadinstitute.org/morpheus>.

**Figure 3: GSK343 treatment leads to autophagy-associated, caspase-independent cell death in differentiating mESCs.**

3a: Annexin-PI assay in mESCs; RA, GSK343 and RA\_343 treated cells. Y axis represents percentage of Annexin positive, PI-positive and Annexin+PI positive cells. N= 3 biological replicates. Error bar indicates standard error of the mean (SEM). Asterisks indicate statistically significant differences (\*:  $p < 0.05$ , \*\*:  $p < 0.005$ ; paired t-test). 3b: Immunoblot depicting intact caspase 3 and cleaved caspase 3 in mESCs; RA, GSK343 and RA\_343 treated cells. mESCs treated with etoposide were used as positive control for caspase-dependent apoptosis.  $\alpha$ -tubulin is used as loading control. N= 3 biological replicates. 3c: GFP intensity depicting autophagy levels in mESCs; RA, GSK343 and RA\_GSK343 treated cells. Y axis depicts relative fluorescence intensity normalised to mESCs. Error bar indicates standard error of the mean (SEM). Asterisks indicate statistically significant differences compared to ES (\*:  $p < 0.05$ , \*\*:  $p < 0.005$ ; paired t-test). N= 3 biological replicates. 3d: GFP intensity depicting autophagy levels in mESCs, Wortmannin treated mESCs, RA\_GSK343 treated cells and RA\_GSK343+ Wortmannin treated cells. Y axis depicts relative fluorescence intensity normalised to mESCs. N= 3 biological replicates. Error bar indicates standard error of the mean (SEM). Asterisks indicate statistically significant differences (\*:  $p < 0.05$ ; paired t-test). 3e: Annexin-PI assay in mESCs, RA\_GSK343 and RA\_GSK343+Wortmannin treated cells. Y axis represents percentage of Annexin-positive, PI-positive and Annexin+PI-positive cells. N= 3 biological replicates.

**Figure 4: Expression of the autophagy gene *Dram1* is regulated by EZH2 in mESCs and differentiating cells.**

4a: RT-qPCR analysis of *Dram1* expression in mESCs; RA, GSK343 and RA\_GSK343 treated cells. Y axis represents fold change wrt *Gapdh* normalised to mESCs. N=3 biological replicates. Error bar indicates standard error of the mean (SEM). Asterisks indicate statistically significant differences compared to

mESCs (\*:  $p < 0.05$ , \*\*:  $p < 0.005$ ; paired t-test). 4b: GFP intensity depicting autophagy levels in mESCs; RA, GSK343 and RA\_GSK343 treated cells without and with *Dram1* siRNA. Y axis depicts relative fluorescence intensity normalised to ES cells. N= 3 biological replicates. Error bar indicates standard error of the mean (SEM). Asterisks indicate statistically significant differences. (\*:  $p < 0.05$ , paired t-test). 4c: Annexin-PI assay in mESCs, RA, GSK343 and RA\_GSK343 treated cells without and with *Dram1* siRNA. Y axis represents percentage of Annexin-positive, PI-positive and Annexin+PI positive cells. N= 3 biological replicates. Error bar indicates standard error of the mean (SEM). Asterisks indicate statistically significant differences (\*:  $p < 0.05$ , \*\*:  $p < 0.005$ ; paired t-test). 4d: EZH2 and H3K27me3 enrichment over *Dram1* (Top panel) and *Lamp2* (Bottom panel). IGV Snapshot of ChIP-Seq enrichment is depicted. 4e: ChIP-qPCR analysis depicting the enrichment of H3K4me and H3K27me3 at the *Dram1* promoter. The Y axes represent percentage of input. Error bar indicates standard error of the mean (SEM). 4f: Ezh2 regulates *Dram1* expression to maintain autophagy-apoptosis balance in differentiating ES cells. In mESCs, *Dram1* is repressed by the establishment of H3K7me3 by the Polycomb enzyme EZH2. During RA mediated differentiation, *Dram1* is upregulated and the activating H3K4me3 mark is established on the promoter. However, the H3K27me3 mark is retained on the promoter, leading to a bivalent chromatin domain. This is accompanied by an increase in autophagy and cell death, with cell death levels restricted to 30-50%. In the presence of the inhibitor for Polycomb protein EZH2, H3K27me3 levels over the *Dram1* promoter are drastically reduced. This, coupled with the activating H3K4me3 mark, leads to “hyper-expression” of *Dram1*. This results in a shift between the autophagy and cell death balance and results in a drastic increase in caspase-independent cell death. Thus, a Polycomb mediated regulation of *Dram1* levels during ES cell differentiation maintains the balance between autophagy and cell death.

## Supplemental Figures

Supplemental Figure 1:



S1a: GFP and mCherry positive puncta in LC3-tagged mESCs and mESCs treated with Rapamycin and chloroquine. Nuclei are labelled with DAPI. Scale bar =10µm. S1b: Quantitation of GFP and mCherry positive puncta in LC3-tagged mESCs and mESCs treated with Rapamycin and chloroquine. Y axis represents average puncta per cell. N=150 cells. S1c: RT-qPCR analysis of pluripotency and neural gene expression in mESCs and RA-treated cells. Y axis represents fold change wrt *Gapdh* normalised to mESCs. N=3 biological replicates. S1d: List of autophagy genes upregulated upon neural differentiation of mESCs. Fold change normalised to mESCs is depicted.

Supplemental figure S2:

S2a: GFP intensity depicting autophagy levels in mESCs and cells treated with epigenetic inhibitors. Y axis depicts relative fluorescence intensity normalised to mESCs. S2b: Brightfield images depicting the morphology of mESCs, RA, GSK343 and RA\_GSK343 treated cells. Images for day 2 and day 3 of treatment are shown. S2c: Cell counting assay depicting cell numbers after 3 days of plating equal numbers of mESCs, RA, GSK343 and RA\_GSK343 treated cells. The Y axis represents % of cells normalised to mESCs. S2d: Scatter plot depicting FACS analysis of Annexin V-FITC and PI-PE positive cells in mESCs, RA, GSK343 and RA\_GSK343 treated cells. Unstained cells were used as control. S2e: Annexin-PI assay in Etoposide treated ES cells, and RA\_343 treated cells in the absence and presence of Caspase inhibitor. Y axis represents percentage of Annexin positive, PI-positive and Annexin+PI positive cells. N= 3 biological replicates. S2f: RT-qPCR analysis of pro-apoptotic gene expression in mESCs, RA, GSK343 and RA\_GSK343 treated cells. Y axis represents fold change wrt *Gapdh* normalised to mESCs. N=3.

Supplemental figure S3:

S3a: Immunoblot depicting LC3I, LC3II and H3K27me3 in mESCs, RA, GSK343 and RA\_GSK343 treated cells.  $\alpha$  tubulin is used as loading control. S3b: RT-qPCR analysis of *Dram1* expression in mESCs; RA, GSK343 and RA\_GSK343 treated cells in presence of non-targeting siRNA and *Dram1* siRNA. Y axis represents fold change wrt *Gapdh* normalised to mESCs. N=3. Error bar indicates standard error of the

mean (SEM). S3c: RT-qPCR analysis of *p53* expression in mESCs; RA, GSK343 and RA\_GSK343 treated cells. Y axis represents fold change wrt *Gapdh* normalised to mESCs. N=3. S3d: IGV snapshot depicting RNA, H3K4me3 and H3K27me3 enrichment over the *Dram1* promoter in mESCs and NPCs. S3e: CHIP-qPCR analysis depicting the enrichment of H3K4me and H3K27me3 at the *Gapdh* and *Hoxd13* promoter. The Y axes represent percentage of input. N=3 biological replicates.



**Figure 1**

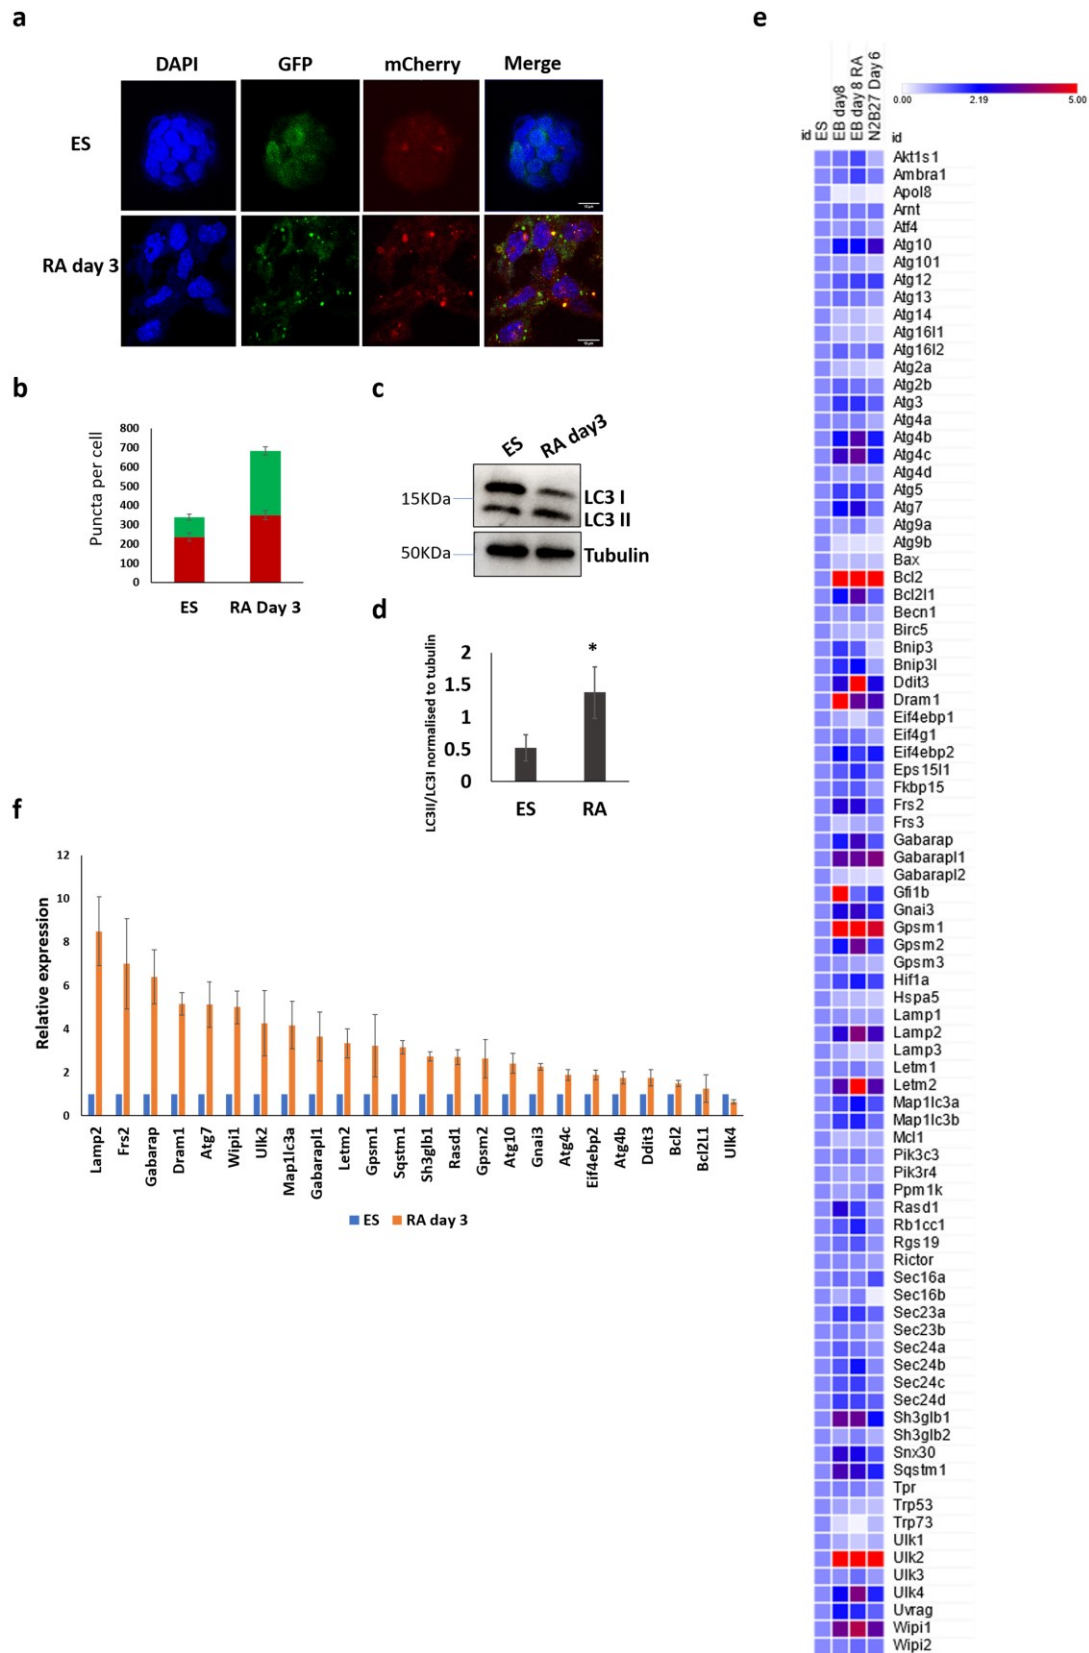

**Figure 2**

**a**

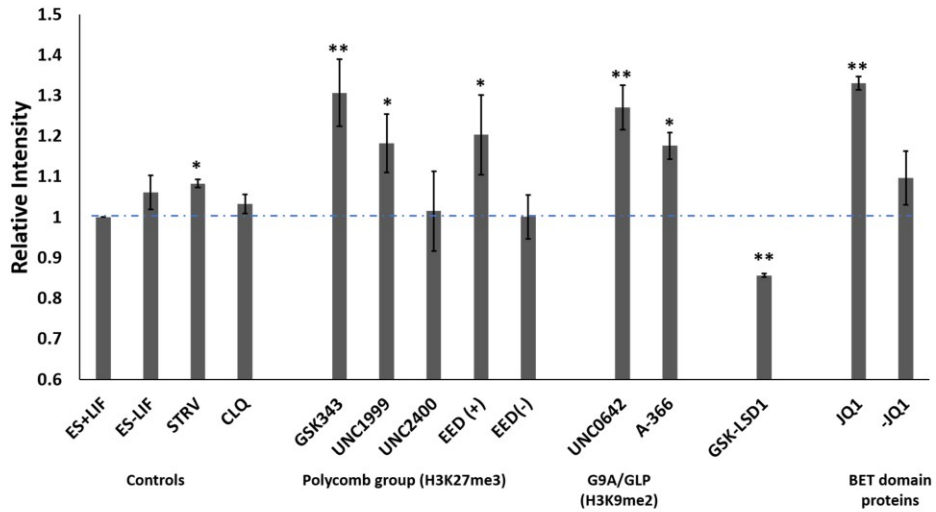

**b**

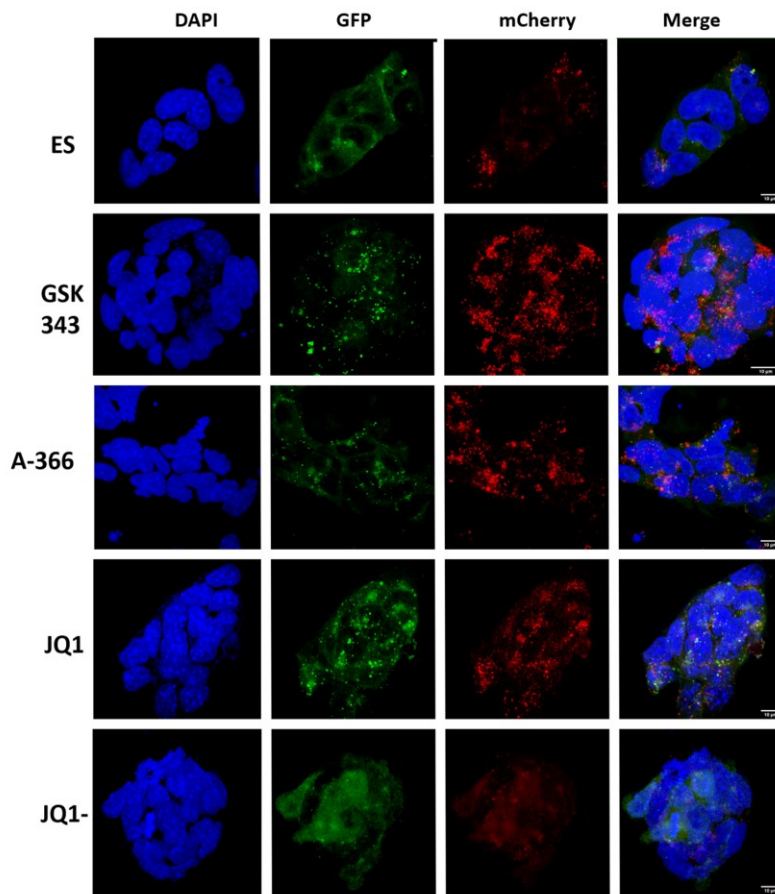

**c**

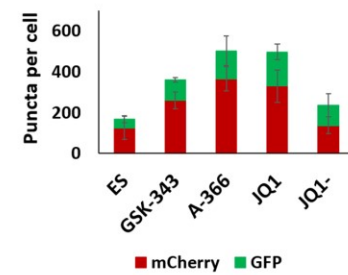

**d**

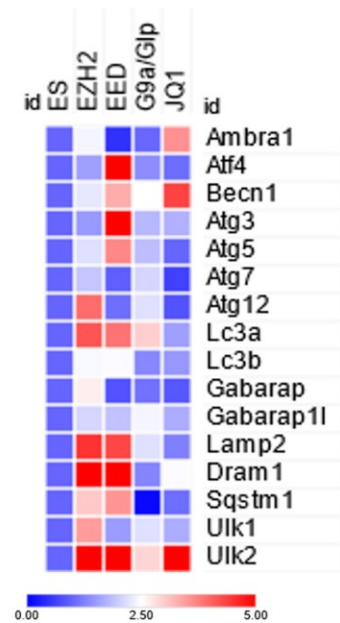

**Figure 3**

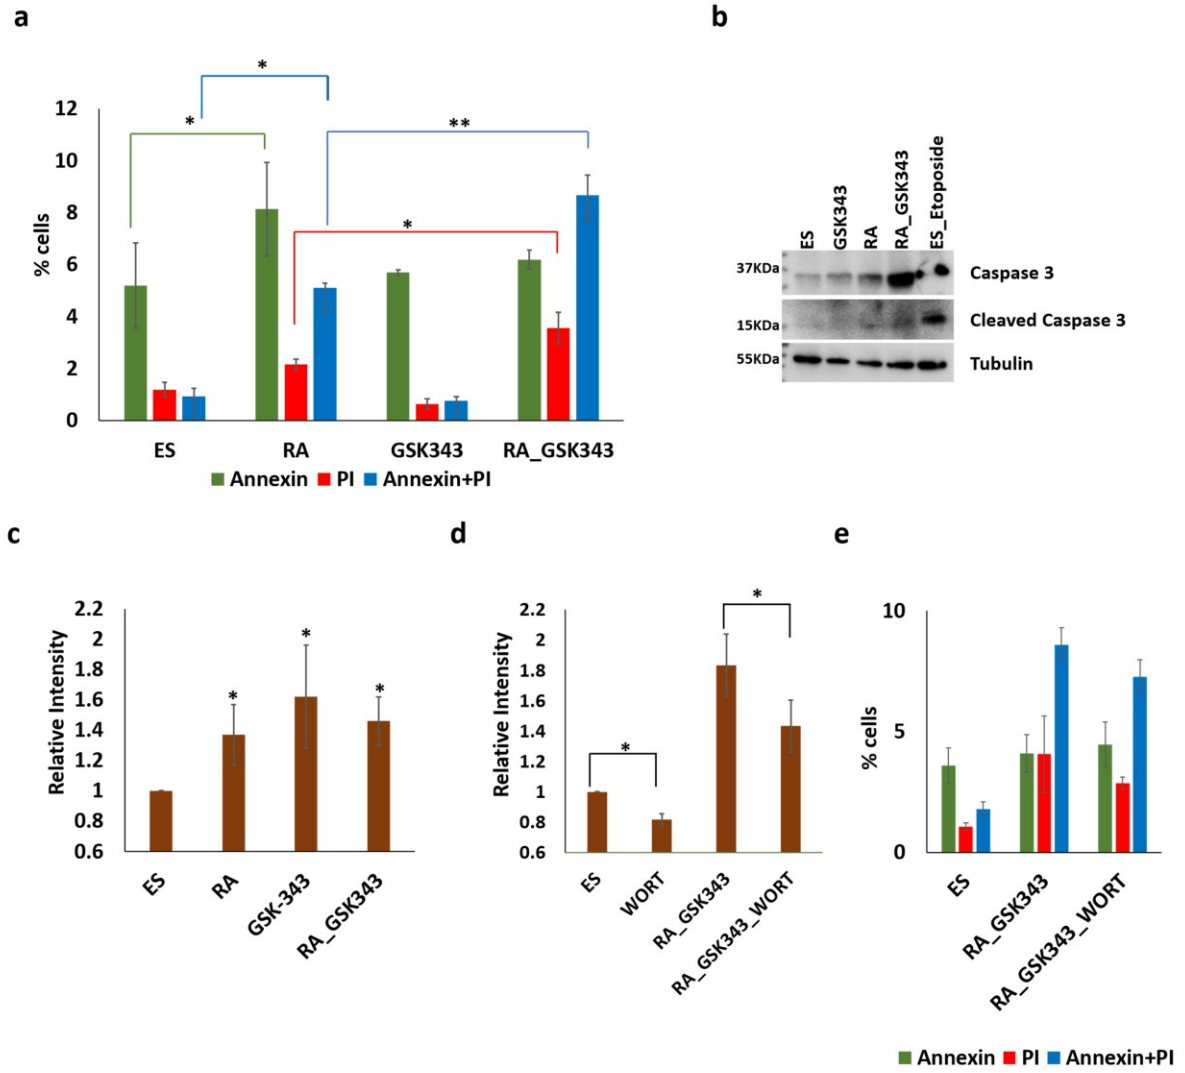

**Figure 4**

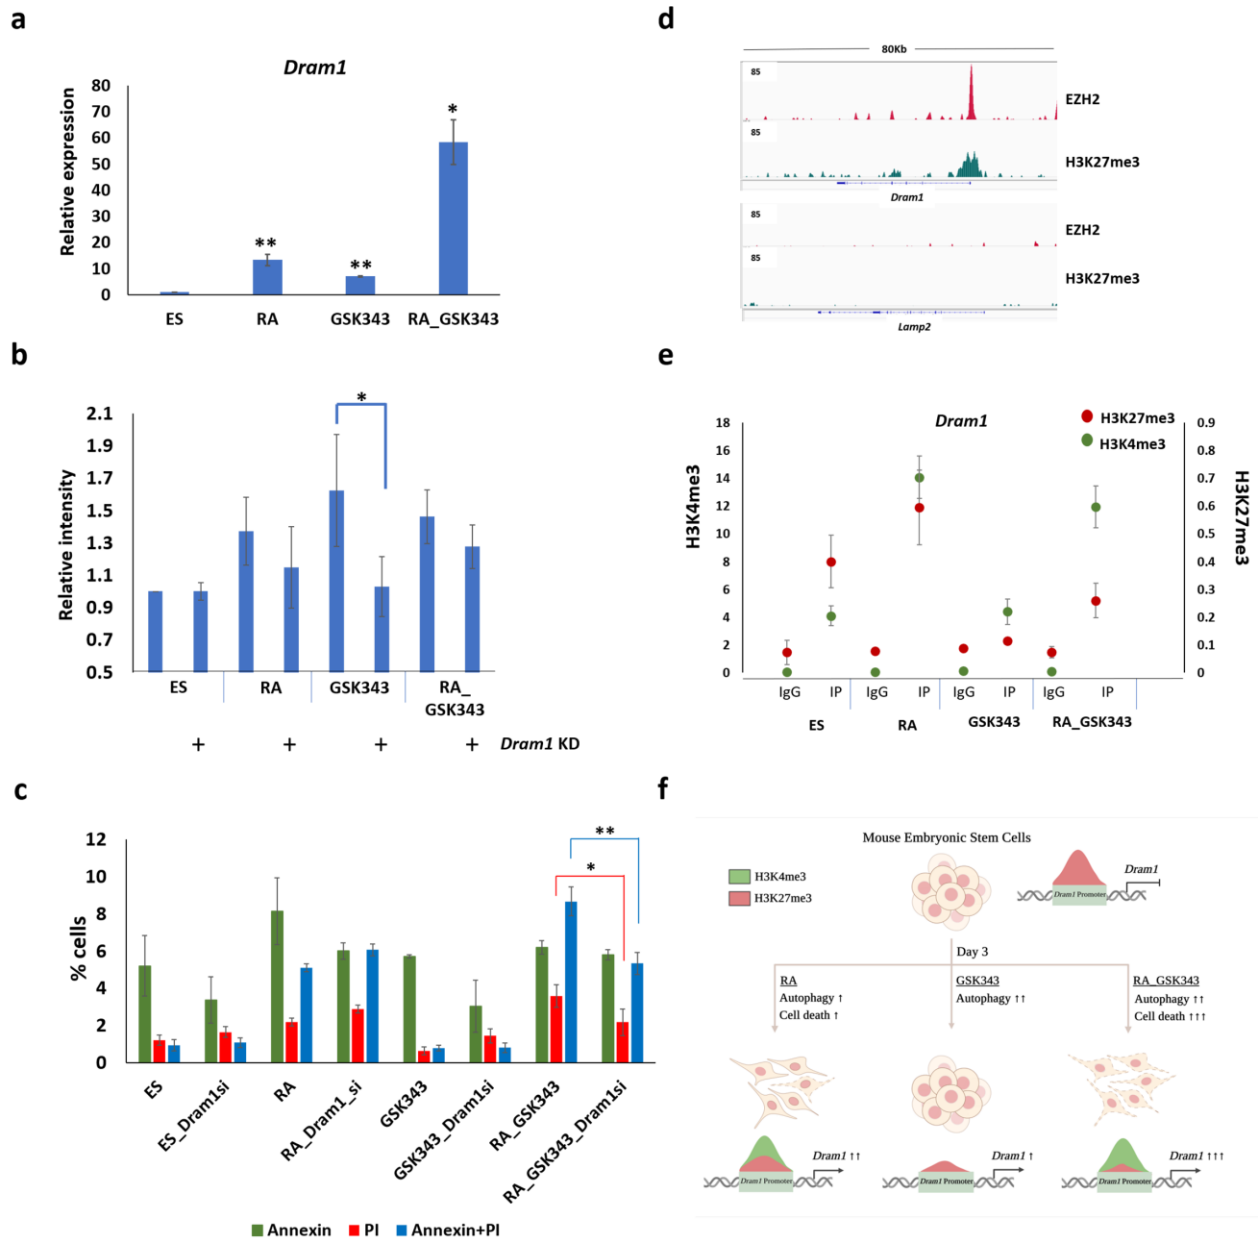

**Figure S1**

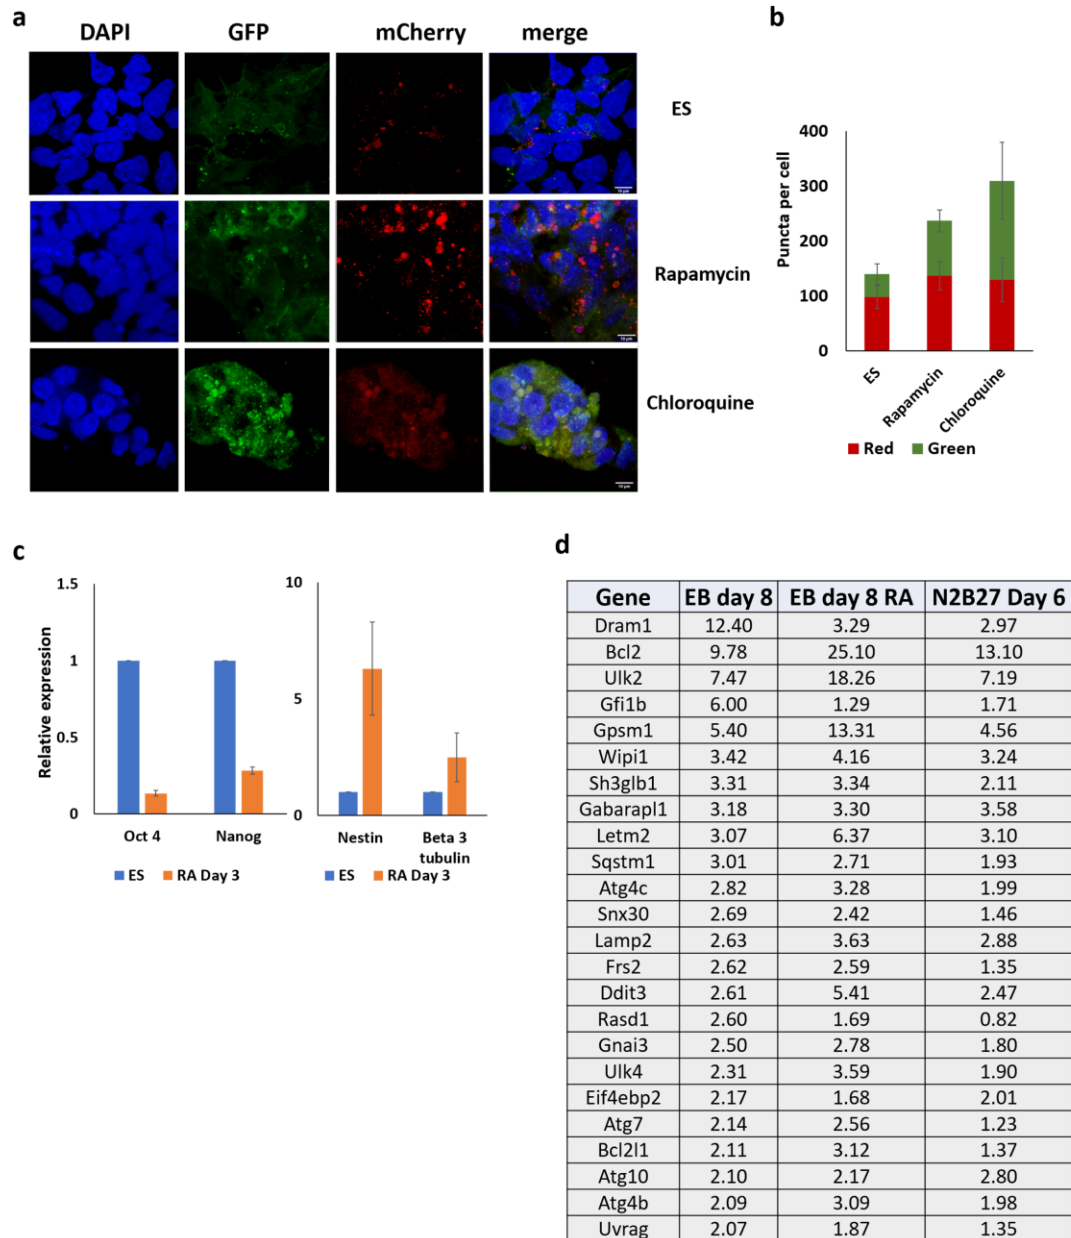

**Figure S2**

**a**

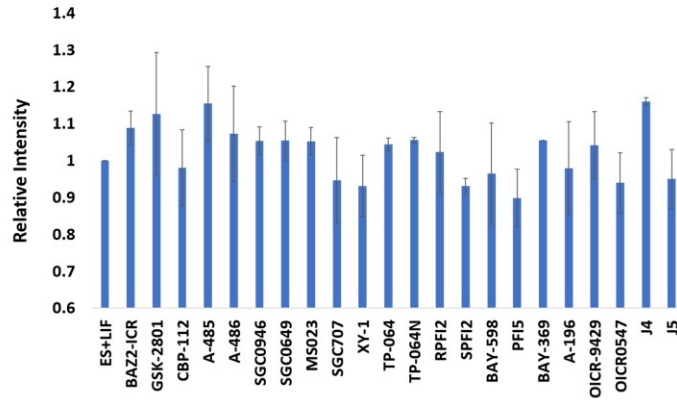

**b**

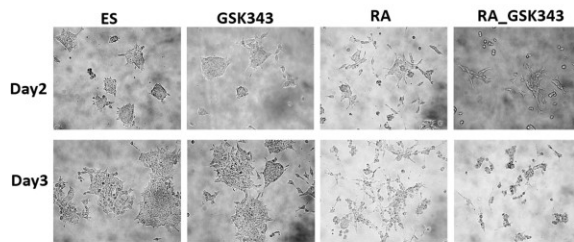

**c**

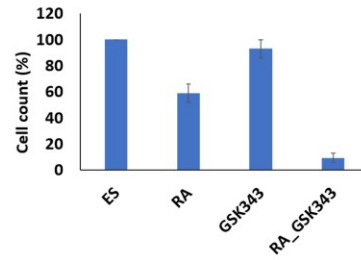

**d**

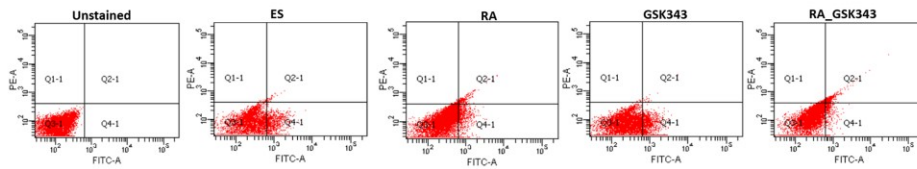

**e**

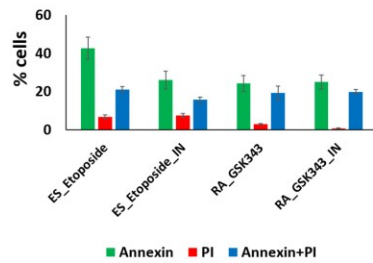

**f**

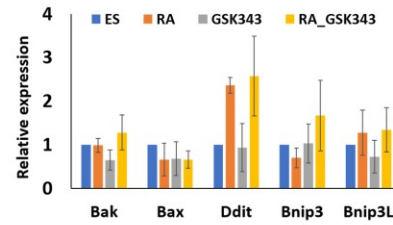

**Figure S3**

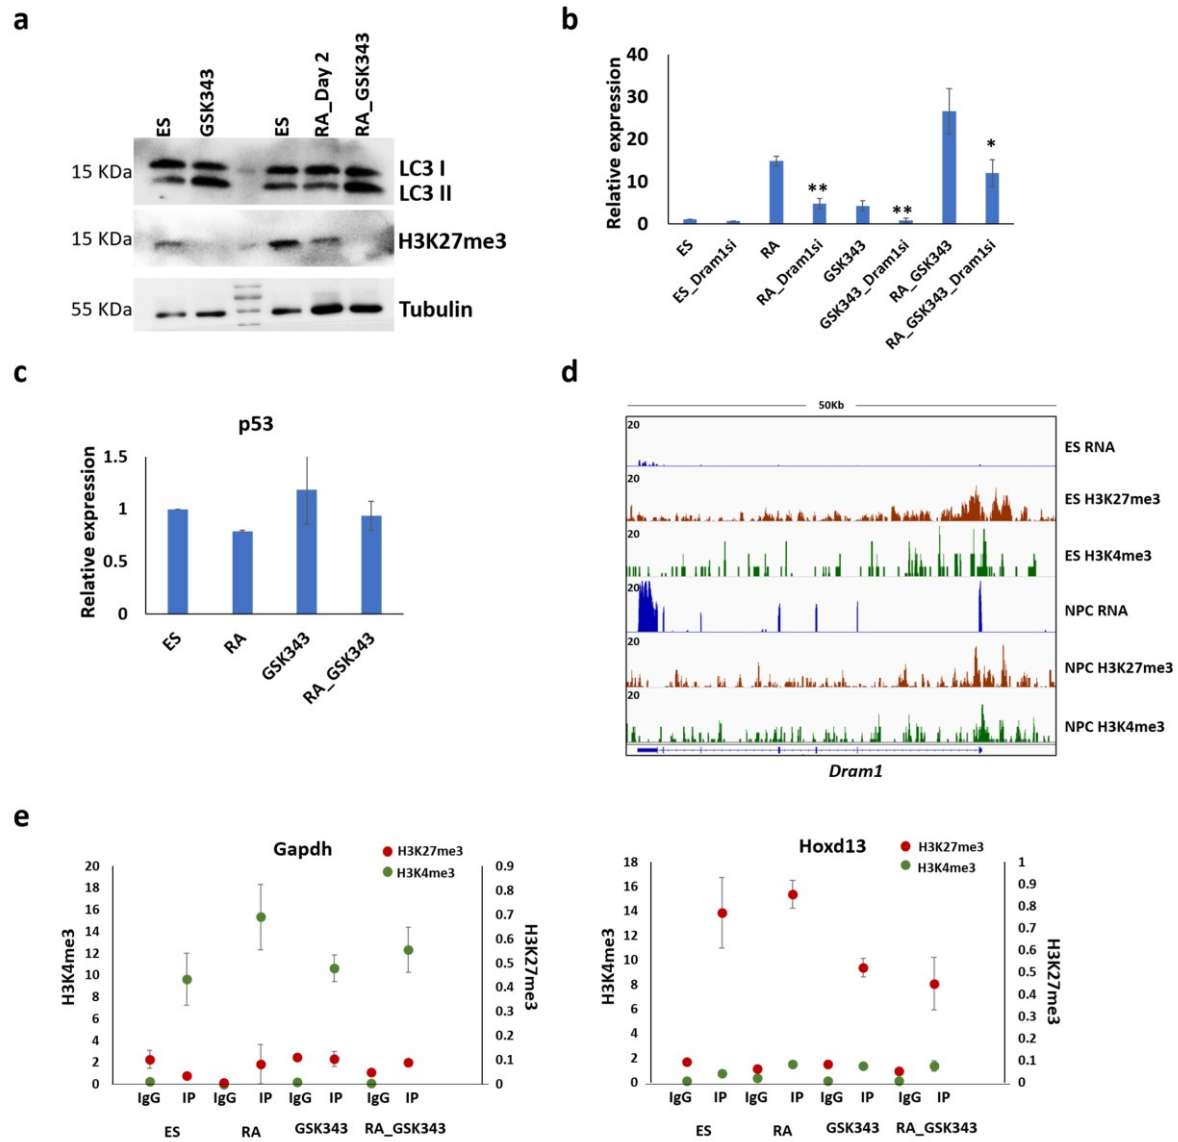



**Supplemental Table 1: Drugs used for epigenetic inhibitor screen**

| Target                  | Drug      | Concentration ( $\mu$ M) | Treatment (Hours) |
|-------------------------|-----------|--------------------------|-------------------|
| BRPF2(1)/TAF1(2)        | BAY-299   | 1                        | 1                 |
| BAZ2A/B                 | BAZ2-ICR  | 1                        | 1                 |
| BAZ2A/B                 | GSK2801   | 3                        | 1                 |
| CBP, EP300 bromo        | ICBP112   | 3                        | 1                 |
| CBP, EP300 HAT          | A-485     | 0.8                      | 3                 |
| CBP, EP300 HAT negative | A-486     | 0.8                      | 3                 |
| BET                     | JQ1       | 0.2                      | 6                 |
| BET (negative)          | -JQ1      | 0.2                      | 6                 |
| BRD9                    | I-BRD9    | 1                        | 18                |
| PRMT type I             | MS023     | 1                        | 20                |
| SMYD2                   | BAY598    | 1                        | 24                |
| JMJD3, UTX, JARID1B     | GSK J4    | 5                        | 24                |
| WDR5                    | OICR-9429 | 3                        | 24                |
| WDR5 negative           | OICR-0547 | 3                        | 24                |
| SETD7                   | R-PFI-2   | 1                        | 24                |
| SETD7 (negative)        | S-PFI-2   | 1                        | 24                |
| SMYD2                   | PFI-5     | 3                        | 24                |
| PRMT3                   | SGC 707   | 1                        | 24                |
| PRMT3                   | SGC XY    | 1                        | 24                |
| SUV420H1/2              | A-196     | 1                        | 48                |
| LSD1                    | GSKLSD1   | 1                        | 48                |
| G9a, EHMT1              | A-366     | 1                        | 72                |
| EED                     | A-395     | 1                        | 72                |
| EED (Negative)          | A-395N    | 1                        | 72                |
| EZH2                    | GSK343    | 3                        | 72                |
| Dot1L                   | SGC0946   | 1                        | 72                |
| PRMT4                   | TP-064    | 1                        | 72                |
| PRMT4 (negative)        | TP-064N   | 1                        | 72                |
| G9a, EHMT1              | UNC0642   | 1                        | 72                |
| EZH2, EZH1              | UNC1999   | 3                        | 72                |
| EZH2, EZH1 (negative)   | UNC2000   | 3                        | 72                |



**Supplemental Table 2: primers used for the study**

| Target         | Forward Primer               | Reverse Primer              | Experiment |
|----------------|------------------------------|-----------------------------|------------|
| Lamp2          | AGAGCGTTTCAGATCAACACC        | ATGATGGCGCTTGAGACCAAT       | RT-PCR     |
| Frs2           | GGCCAGATCTAGTGCTCACA         | CCGTTTCCGGGTGTACAGAA        | RT-PCR     |
| Gabarap        | AATGTCATTCCACCCACCAGT        | CGCCACCTCTCTTCGTAGAAT       | RT-PCR     |
| Dram1          | GAGCAATGTTTCGGCACTCG         | GGAGGAGTTGTTCCCTGTGTCA      | RT-PCR     |
| Atg7           | GGAAGTTGAGCGGCGACAG          | AGGCCTGTATGCATTGCTTC        | RT-PCR     |
| Wipi1          | AGCCATAGACCGCAGTTAGC         | TGGTGTGACTCCAGCATTCC        | RT-PCR     |
| Ulk2           | AGGTGTCCAAAGACTCTGCG         | GTAGGTTGACTGCCCCTCC         | RT-PCR     |
| LC3a           | GTCCCCAGTGGATTAGGCAG         | ACCCAAAAGAGCAACCCGAA        | RT-PCR     |
| Gabarapl1      | AGGACCACCCCTTCGAGTAT         | AGAAGTGGCCAACAGTGAGG        | RT-PCR     |
| Letm2          | CCCCGAGTCAAAGGAGAAC          | GGCCTGGAGGATTGCTTCTT        | RT-PCR     |
| Gpsm1          | GCACAGGGCCTCTGAGTTTT         | TTTGTGGAAGGTTGTGGCCT        | RT-PCR     |
| Sqstm1         | GCTGAAGGAAGCTGCCCTAT         | GCCTTCATCCGAGAAACCCA        | RT-PCR     |
| Sh3glb1        | GCCCTCTCCCTCCCC              | TCCATGATGTTTCATGCCGGG       | RT-PCR     |
| Rasd1          | GCTGTCTGTACCCAAGAGCC         | CTTGGCCGGGATACTCAGTT        | RT-PCR     |
| Gpsm2          | AAGAAGCAGGGGCTTAGGATG        | AGGAATGGTCTTCCCTCATGC       | RT-PCR     |
| Atg10          | GAGCGAGCGGTTCTCATT           | CATTCAGCCATCGCCTAT          | RT-PCR     |
| Gnai3          | TGGCCAAAGATCCGAACGAA         | CTCAGCCAGAACAAGGTCGT        | RT-PCR     |
| Atg4c          | TTCCTGGAGGGTTTTGGAGC         | AAGTTCAAAGGGCGAGGAGG        | RT-PCR     |
| Eif4ebp2       | AGTTCCCTGGTCATTTCCC          | GCTTGGAGACTGCCCTAGAC        | RT-PCR     |
| Atg4b          | CTCAGGGCTTGAGAAAGGCT         | GAACAGGGCAGGATCTGCTT        | RT-PCR     |
| Ddit3          | CCTGAGGAGAGAGTGTCCAG         | GACACCGTCTCCAAGGTGAA        | RT-PCR     |
| Bcl2           | GAAGTGGGGGAGGATTGTGG         | GCATGCTGGGGCCATATAGT        | RT-PCR     |
| Bcl2l1         | AGGGGCTTAGCTGCTGAAAG         | GTGGACAAGGATCTTGGGGG        | RT-PCR     |
| Ulk4           | TCGGTTTCTCTGTCCAAGC          | GTCCTGCTTCTCTGCCAAT         | RT-PCR     |
| Pou5f1         | AAAGCCCTGCAGAAGGAGCTAGAA     | AACACCTTCCAAAGAGAACG        | RT-PCR     |
| Nanog          | GCTCAGCACCAAGTGGAGTATCC      | TCCAGATGCGTTCACCAGATAG      | RT-PCR     |
| Nestin         | AAGTTCCAGGCTTCTCTTG          | GTCTCAAGGGTATTAGGCAAGG      | RT-PCR     |
| Beta 3 Tubulin | TCCGAGTACCAGCAGTACCA         | GGCTTCCGATTCTCTGTCAT        | RT-PCR     |
| Bak1           | CCTTCGGGGTCTTCGCTTTT         | GGAGACCACCGTCACTTGTC        | RT-PCR     |
| Bax            | CTGGATCCAAGACCAGGGTG         | CTTCCAGATGGTGAGCGAGG        | RT-PCR     |
| Bnip3          | AAATTAAGGGTGCCTGCGG          | CAAAGTGGGGTTCGTGGGTA        | RT-PCR     |
| Bnip3l         | GAGAGCCGGATACTGTCGTC         | CCATTGCTGCTGTTTCATGGG       | RT-PCR     |
| p53            | TCCGAAGACTGGATGACTGC         | GATCGTCCATGCAGTGAGGT        | RT-PCR     |
| Gapdh          | AACAGCAACTCCCACTCTTC         | CCTGTTGCTGTAGCCGTATT        | RT-PCR     |
| Dram1P         | GGGAGAAAGGGGTTGACGTG         | CTCAGGGGAATGGCTTTCGT        | ChIP-QPCR  |
| GapdhP         | ATCAGGCCACCTAGTCAGA          | CAATGGCTCAGAAACGCTGC        | ChIP-QPCR  |
| Hoxd13P        | TTCCTAGTTGCGCCGATTGT         | AAACAGTCTTGGGGCAGCAT        | ChIP-QPCR  |
| Dram1 esiRNA   | GGGCGGGTTGATTGCCTGTGCTTCACTC | GGGCGGGTATGCCTCGTCTTCTTTCAT | Dram1KD    |
